# Supplementary material for: DNA origami-based shape IDs for single-molecule nanomechanical genotyping
Source: PubMed Central journal article supplement (PMC5384221; doi:10.1038/ncomms14738), 2017-04-06
Supplement: ncomms14738-s1.pdf [file ncomms14738-s1.pdf]

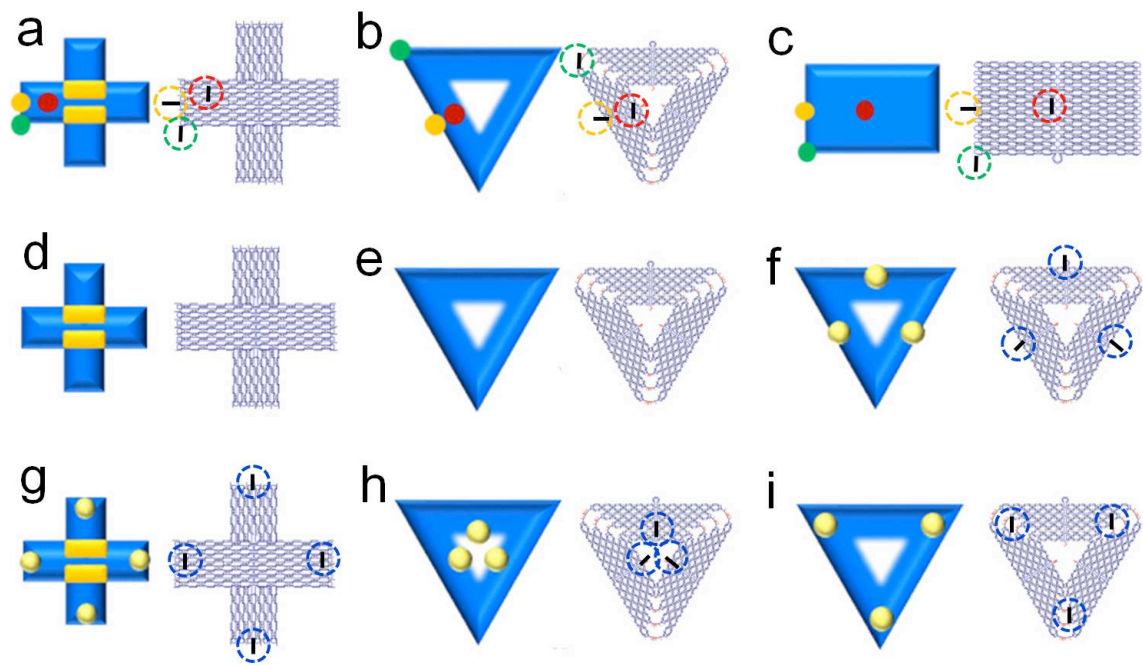

**Supplementary Figure 1 | Schematic illustration of origami shape IDs' design. (a)** The cross shaped DNA origami IDs with one M3' single strand at different positions; **(b)** the triangular shaped DNA origami IDs with one M3' single strand at different positions; **(c)** the rectangular shaped DNA origami IDs with one M3' single strand at different positions. **(d-i)** Six shape IDs were fabricated by cross, triangular shaped DNA origami and STV modified different shaped DNA origami at different positions.

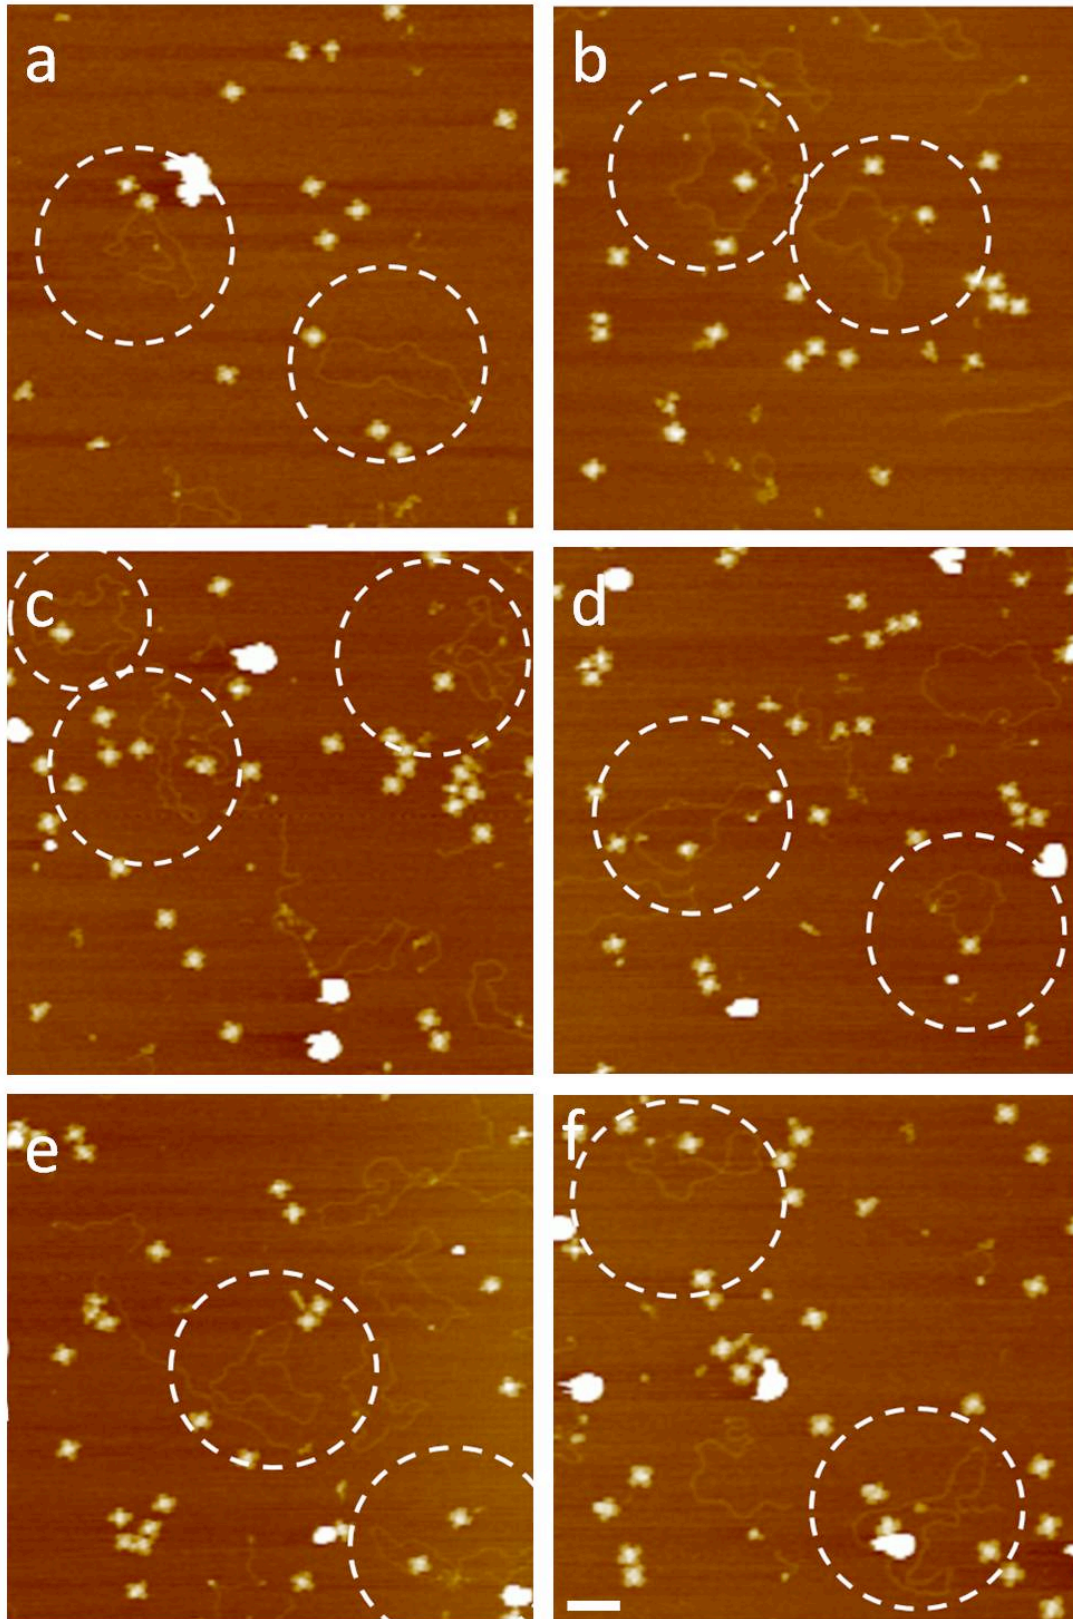

**Supplementary Figure 2 | (a-f)** The site-specific single labeling of phiX 174 by cross shaped ID with one M3' strand at the corner point of origami. Scale bar: 200 nm.

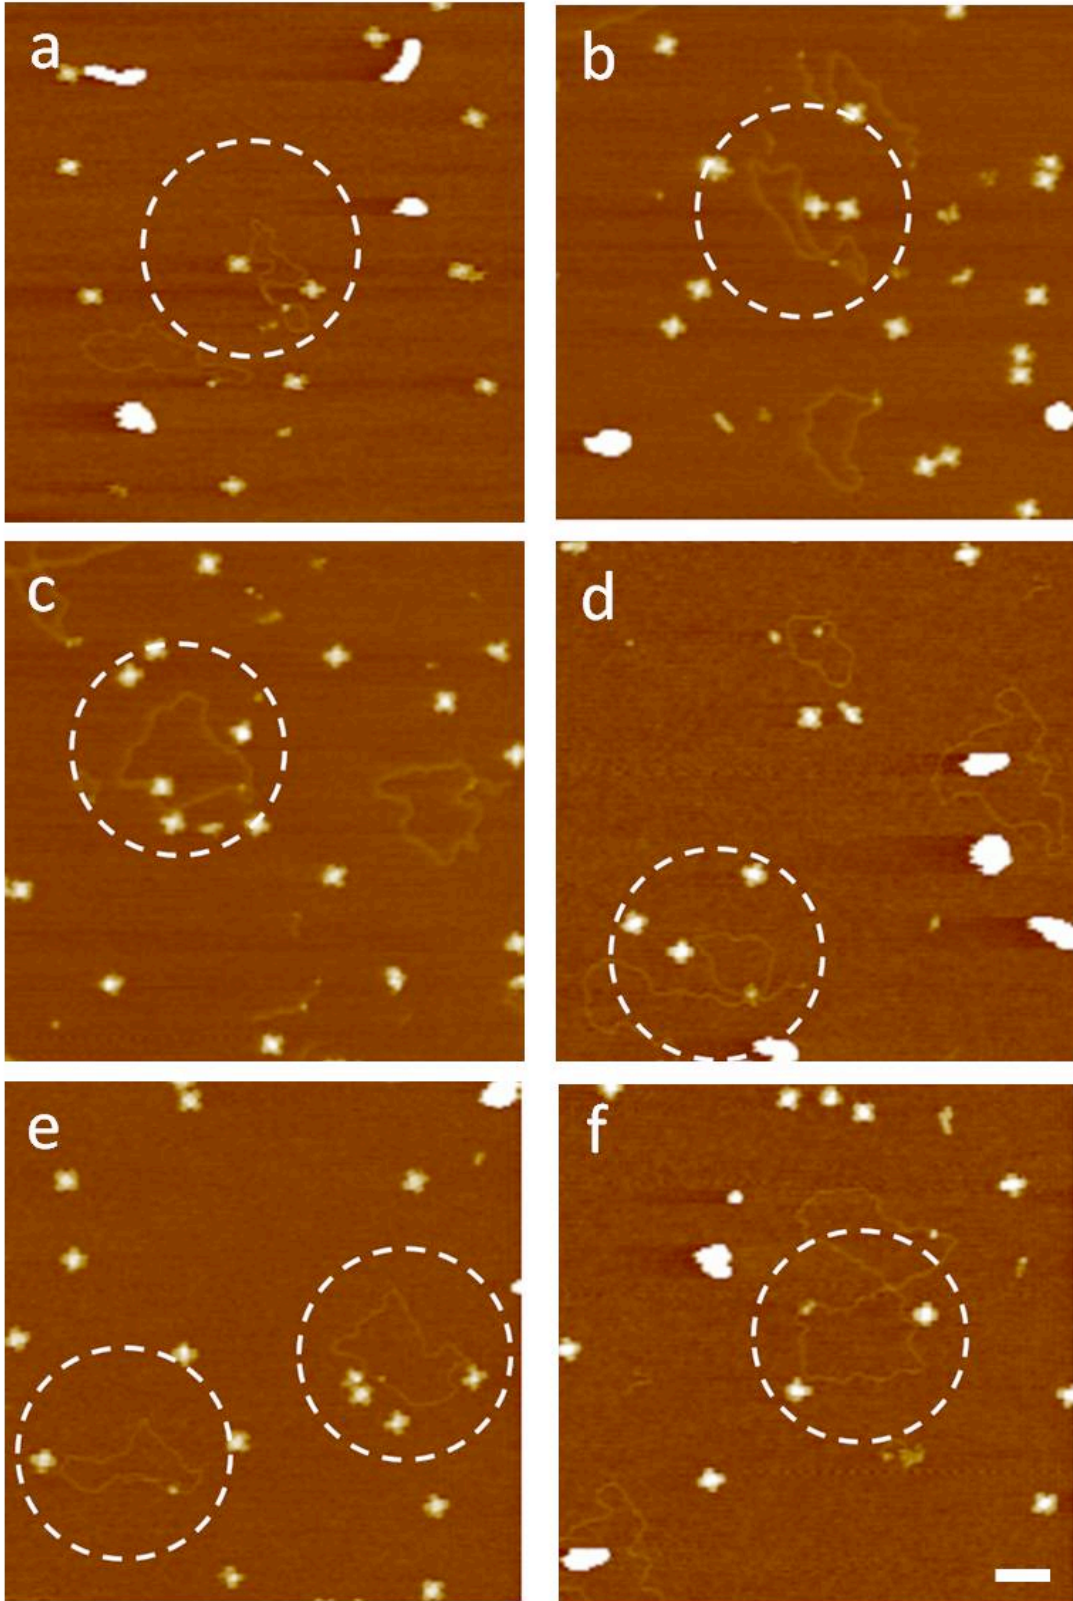

**Supplementary Figure 3** | (a-f) The site-specific single labeling of phiX 174 by cross shaped ID with one M3' strand at the edge middle of origami. Scale bar: 200 nm.



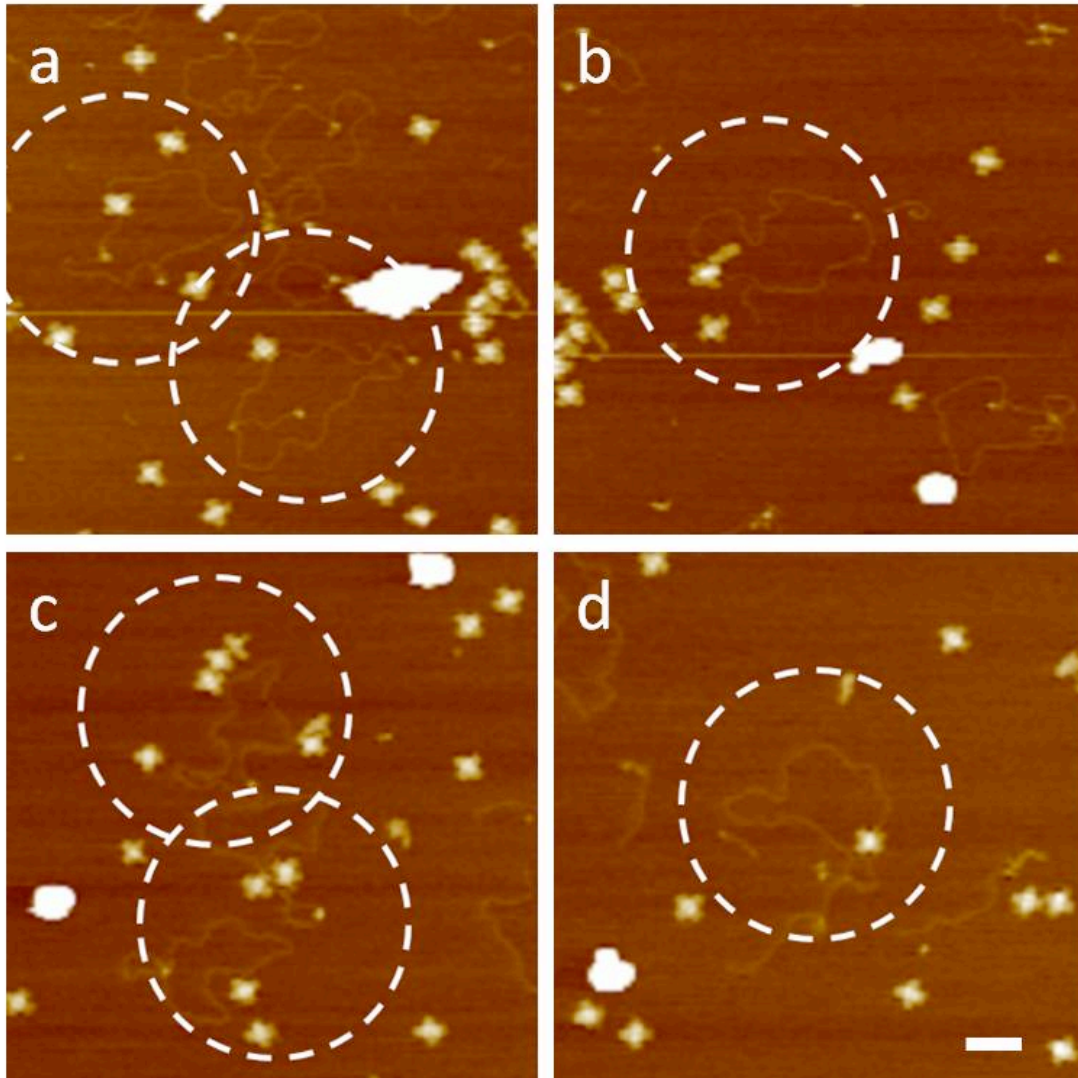

**Supplementary Figure 4 | (a-d)** The site-specific single labeling of phiX 174 by cross shaped ID with one M3' strand at the inner of origami. Scale bar: 200 nm.



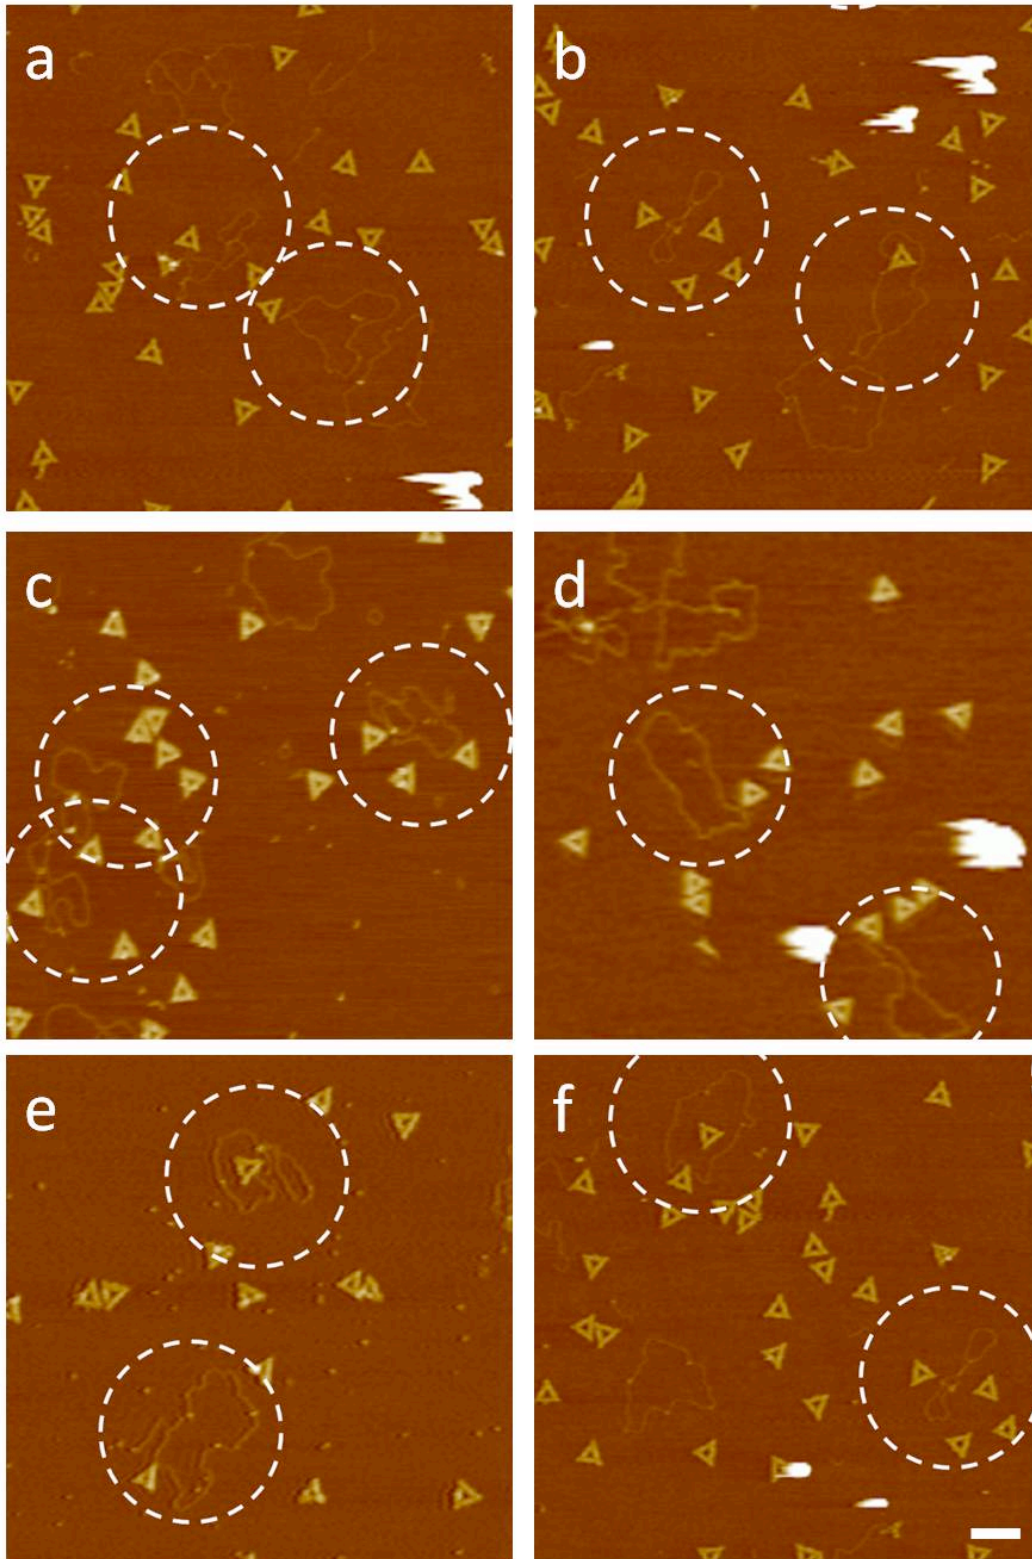

**Supplementary Figure 5 | (a-f)** The site-specific single labeling of phiX 174 by triangular shaped ID with one M3' strand at the corner point of origami. Scale bar: 200 nm.

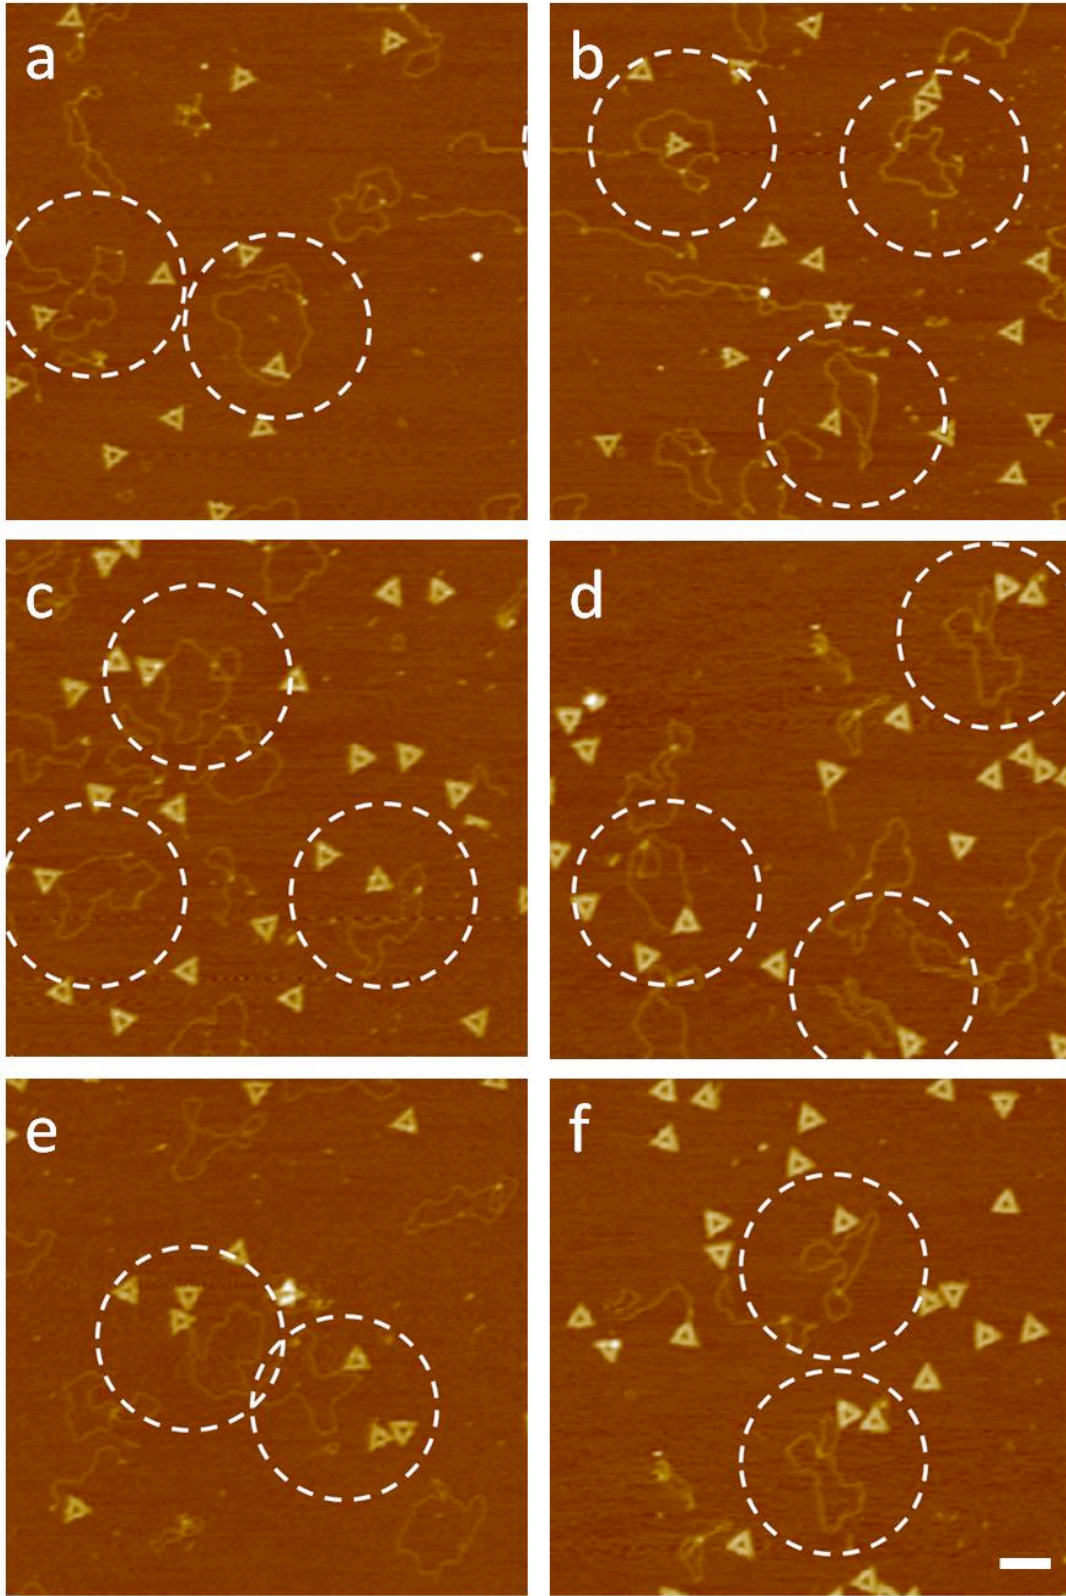

**Supplementary Figure 6 | (a-f)** The site-specific single labeling of phiX 174 by triangular shaped ID with one M3' strand at the edge middle of origami. Scale bar: 200 nm.

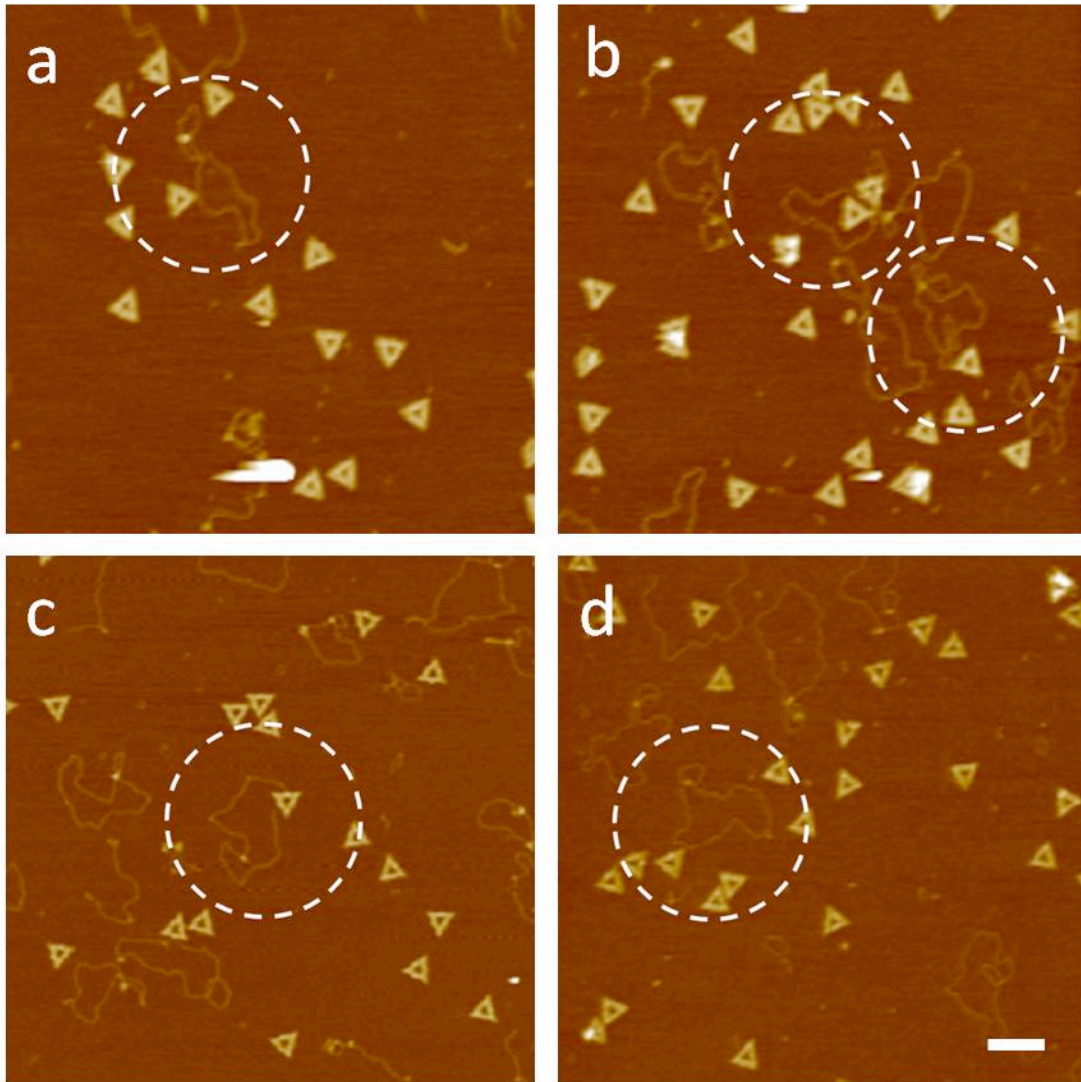

**Supplementary Figure 7 | (a-d)** The site-specific single labeling of phiX 174 by triangular shaped ID with one M3' strand at the inner of origami. Scale bar: 200 nm.



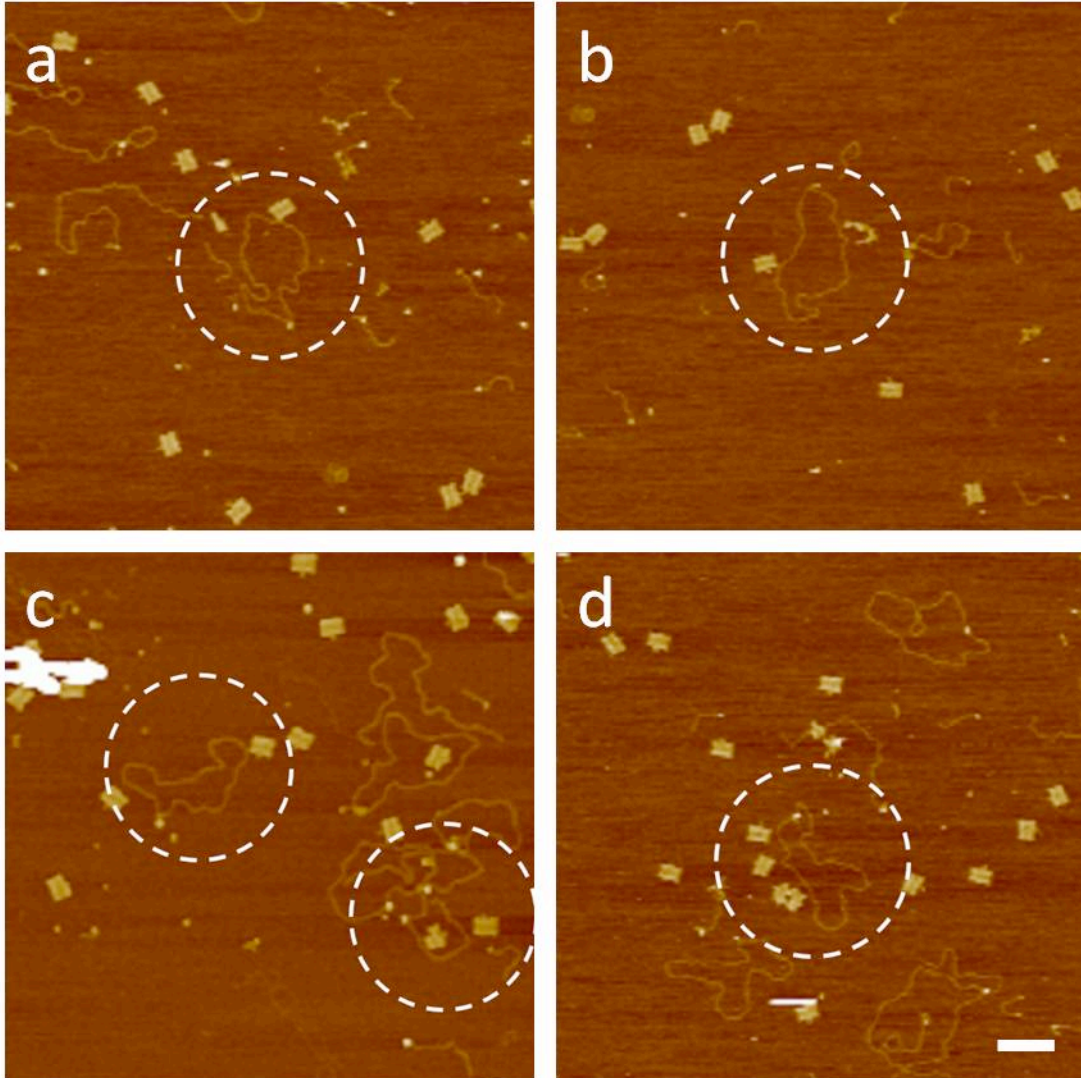

**Supplementary Figure 8** | (a-d) The site-specific single labeling of phiX 174 by rectangular shaped ID with one M3' strand at the corner point of origami. Scale bar: 200 nm.

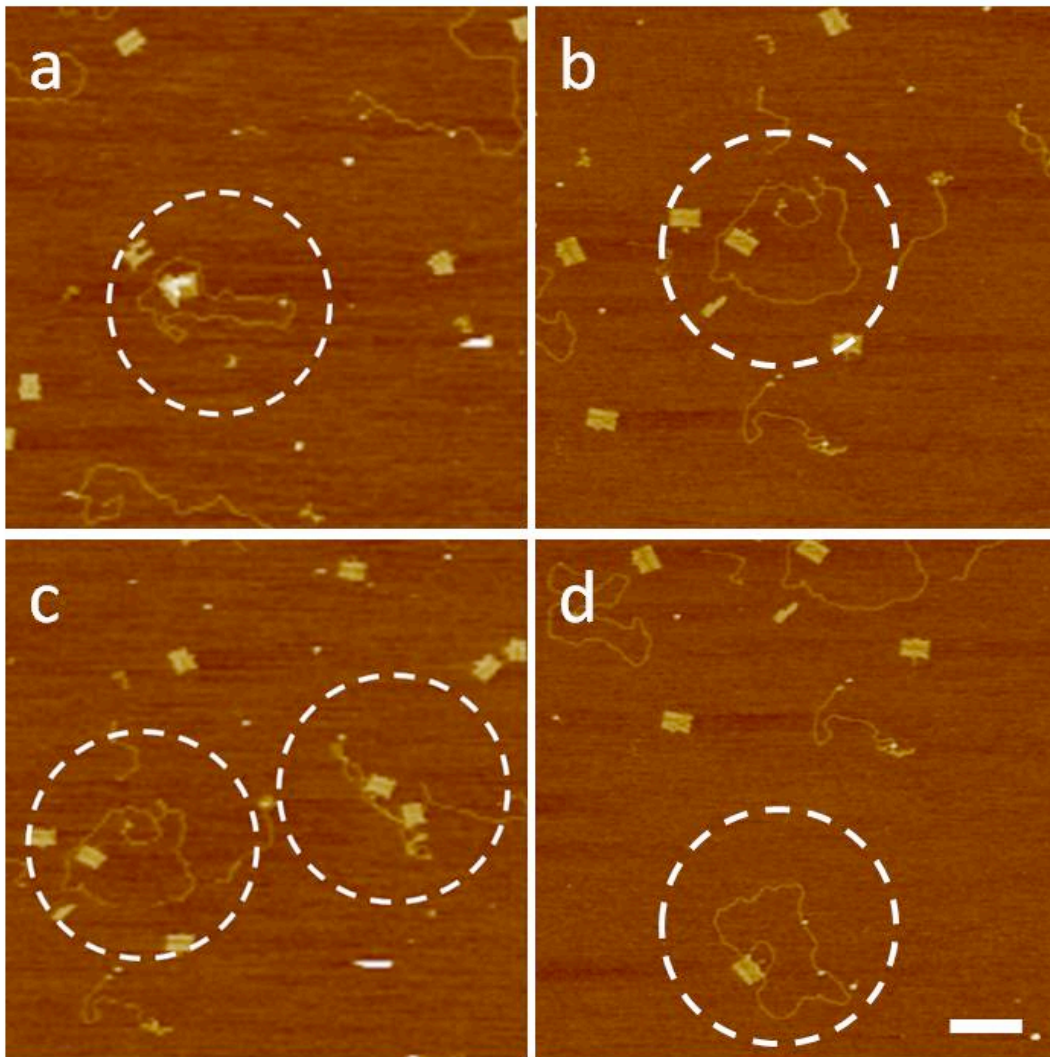

**Supplementary Figure 9 | (a-d)** The site-specific single labeling of phiX 174 by rectangular shaped ID with one M3' strand at the edge middle of origami. Scale bar: 200 nm.

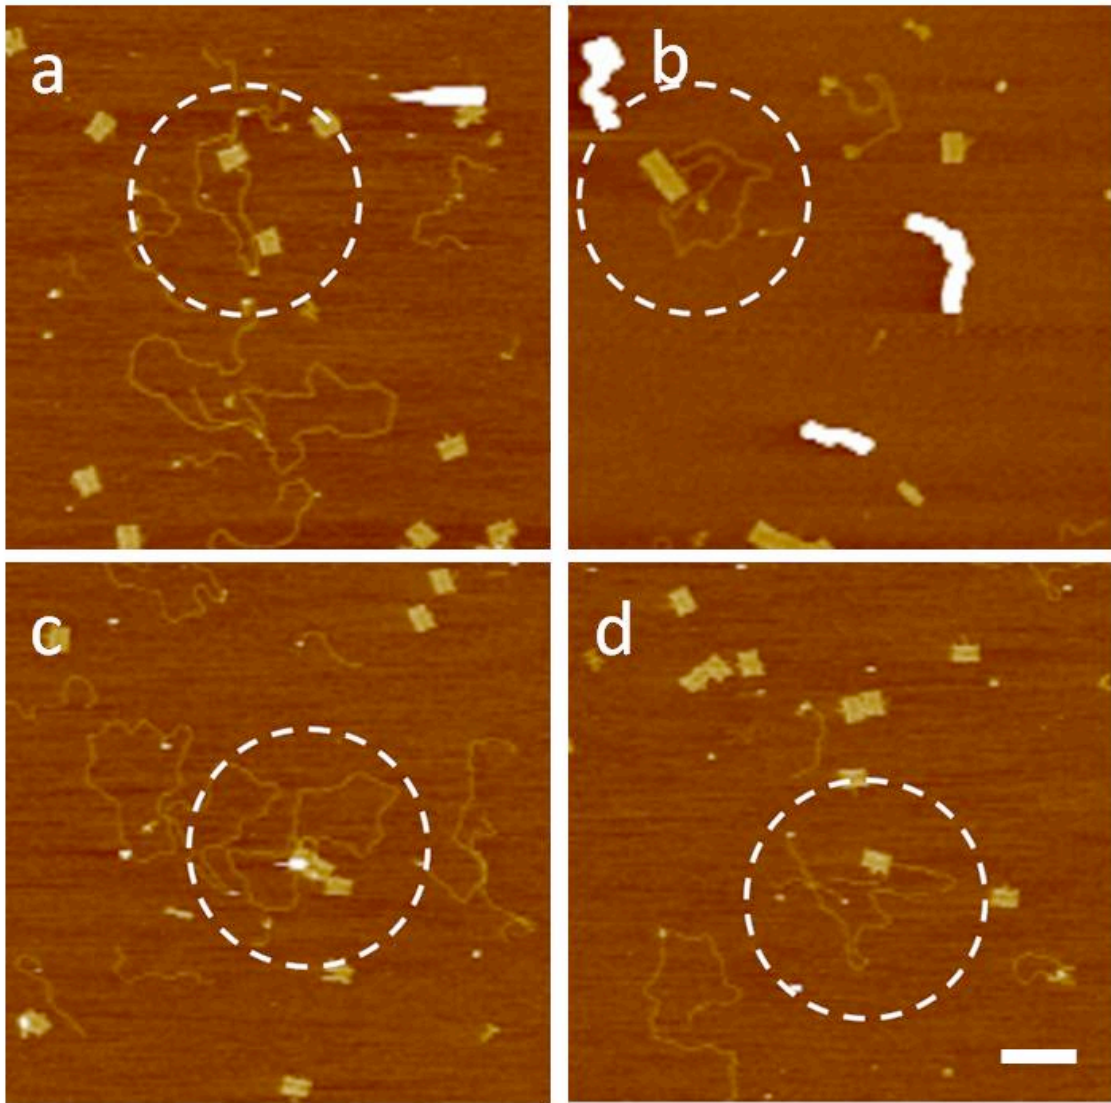

**Supplementary Figure 10** | (a-d) The site-specific single labeling of phiX 174 by rectangular shaped ID with one M3' strand at the inner of origami. Scale bar: 200 nm.



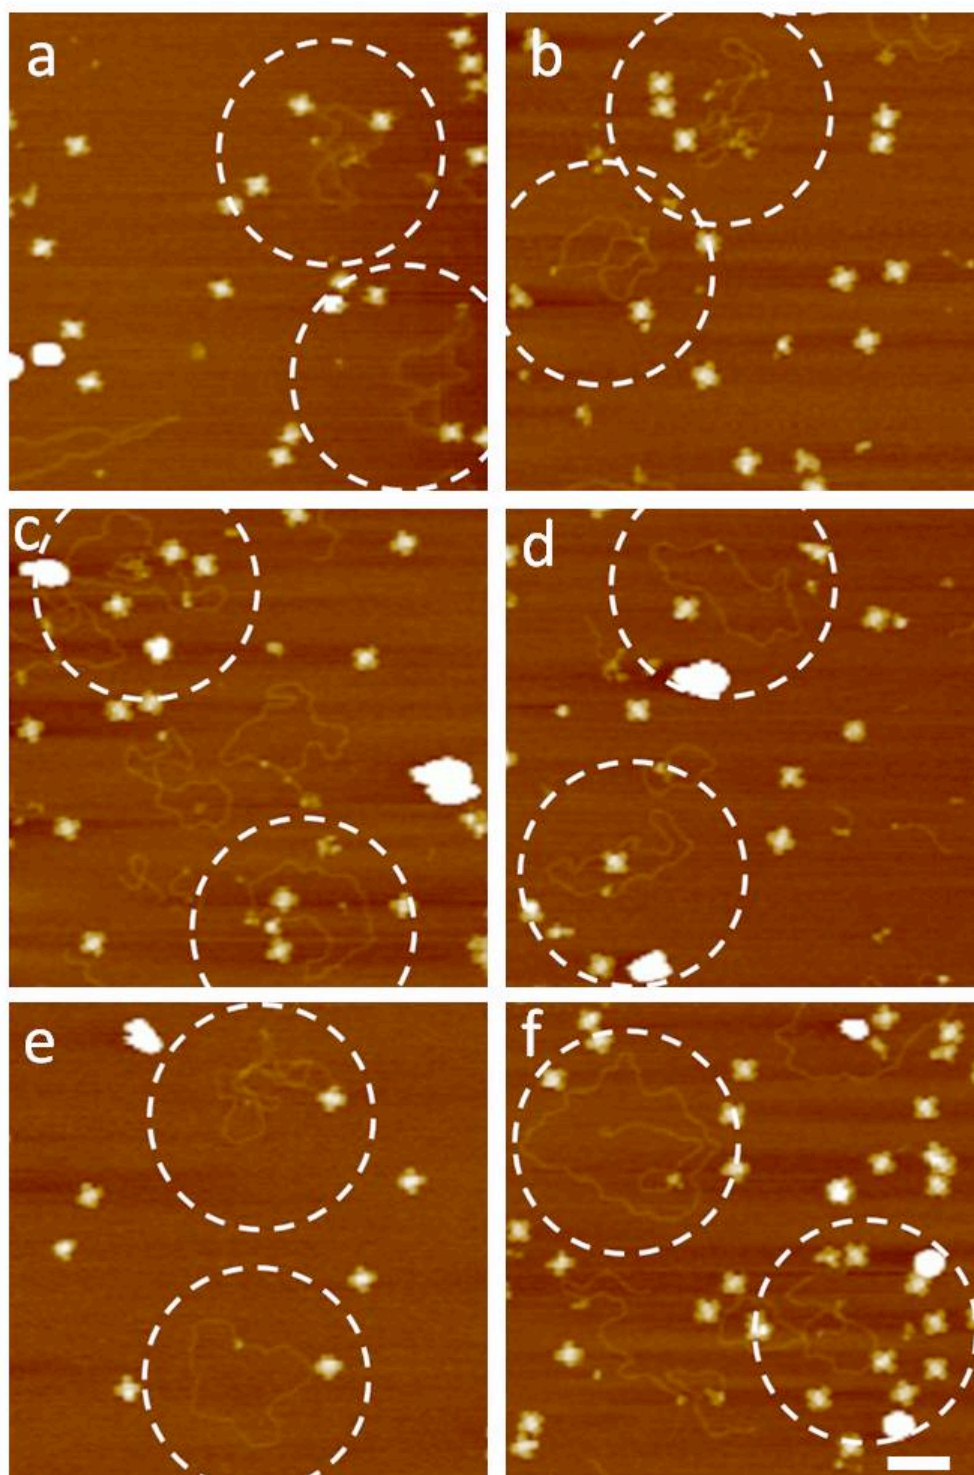

**Supplementary Figure 11** | (a-f) The site-specific single labeling of phiX 174 by cross shaped ID with four M3' strands at the corner point of origami. Scale bar: 200 nm.

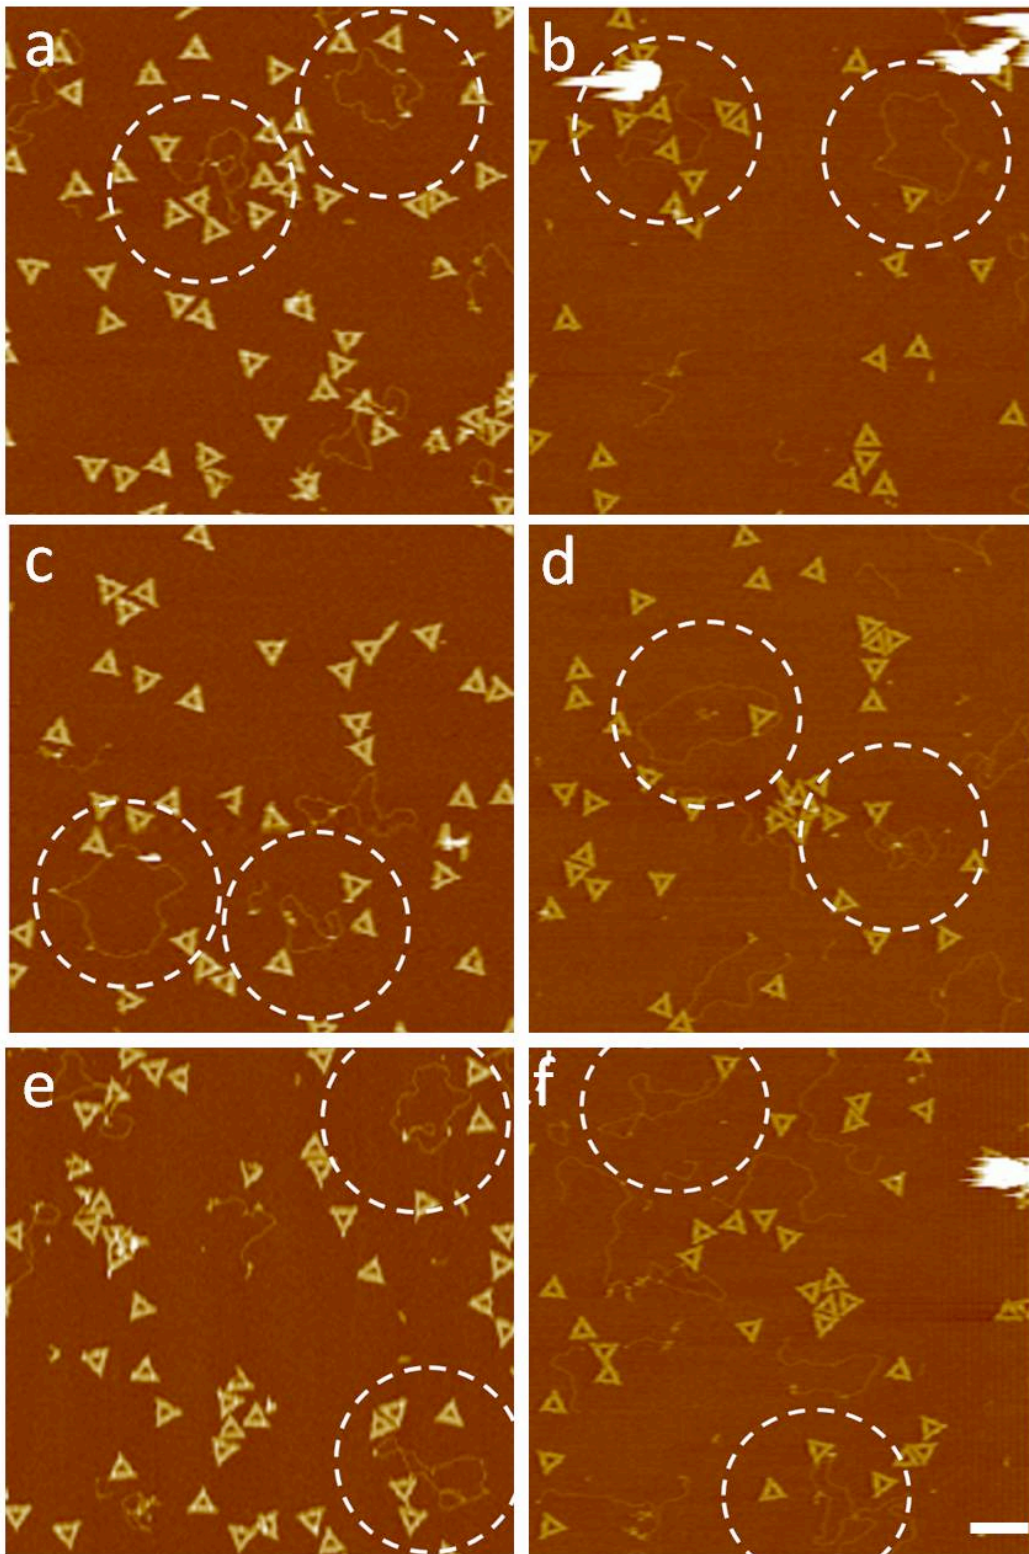

**Supplementary Figure 12 | (a-f)** The site-specific single labeling of phiX 174 by triangular shaped ID with three M3' strands at the corner point of origami. Scale bar: 200 nm.

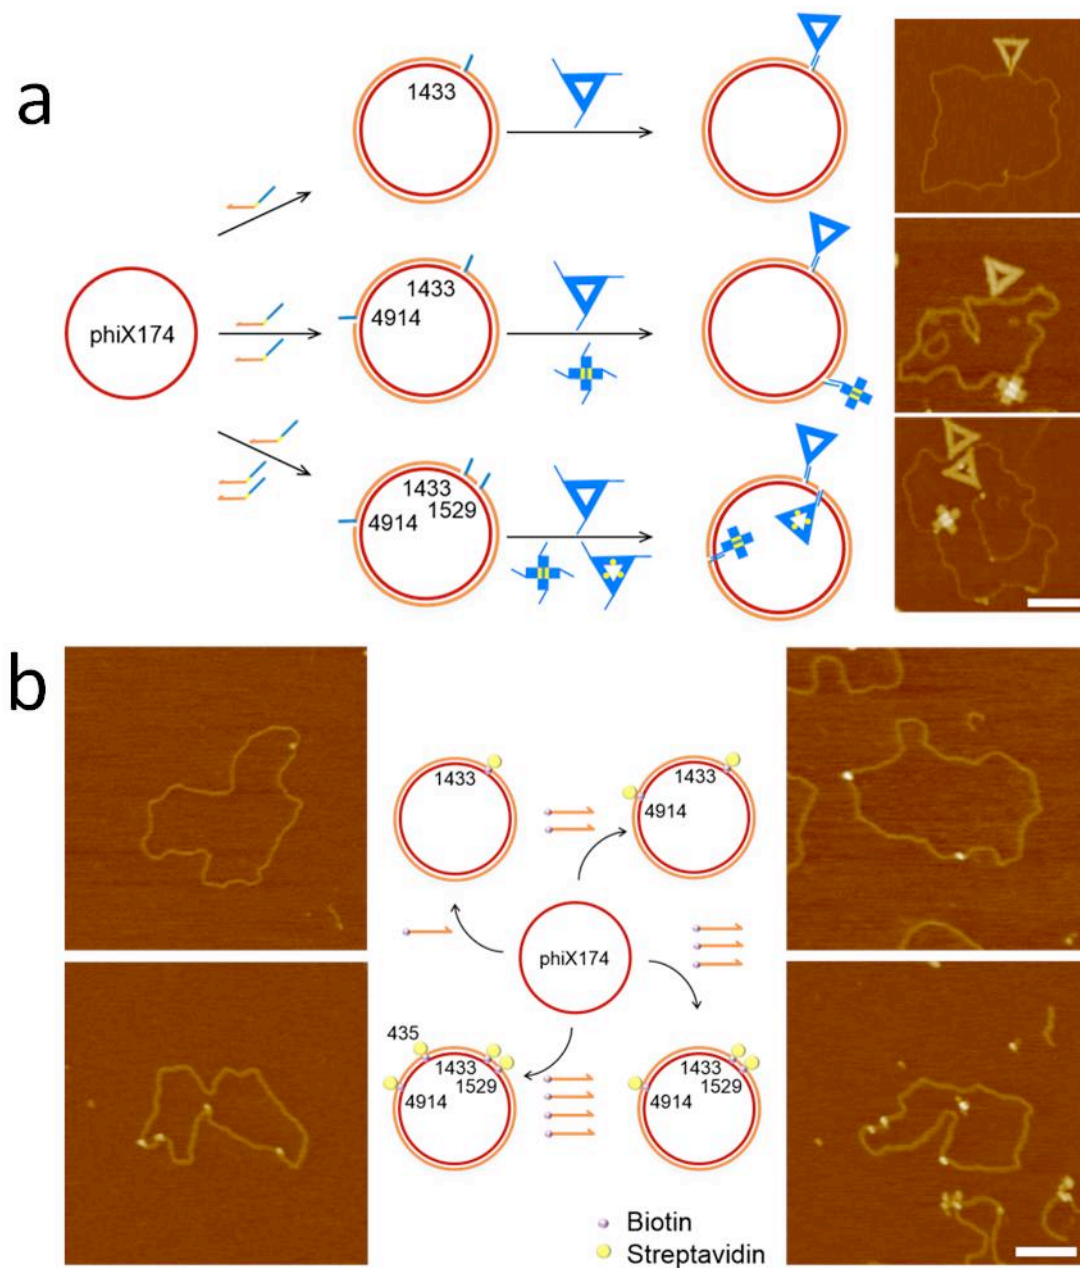

**Supplementary Figure 13** | Schematic illustrations and AFM images of the processes of origami shape IDs (a) and STVs (b) for specific-labeling of phiX174. Scale bar: 200nm.



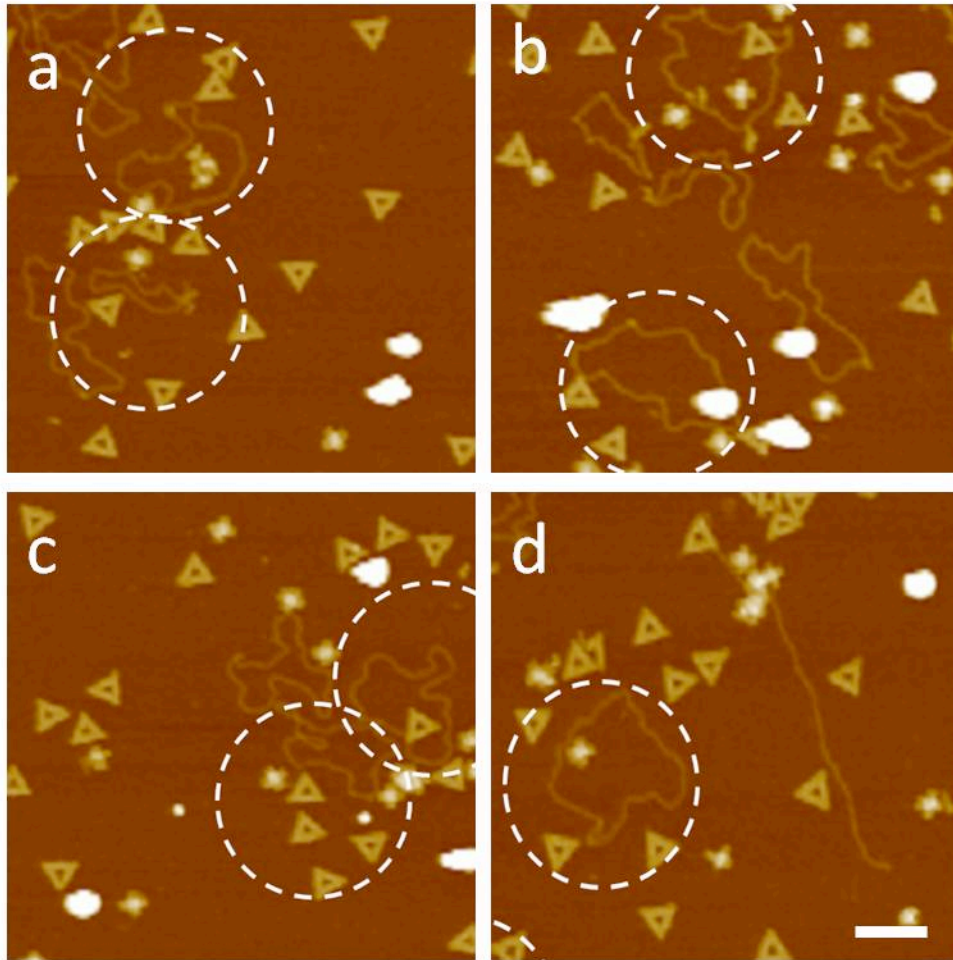

**Supplementary Figure 14** | (a-d) The site-specific dual labeling of phiX 174 by cross and triangular shaped ID with M3' strands at the corner point of origami. Scale bar: 200nm.

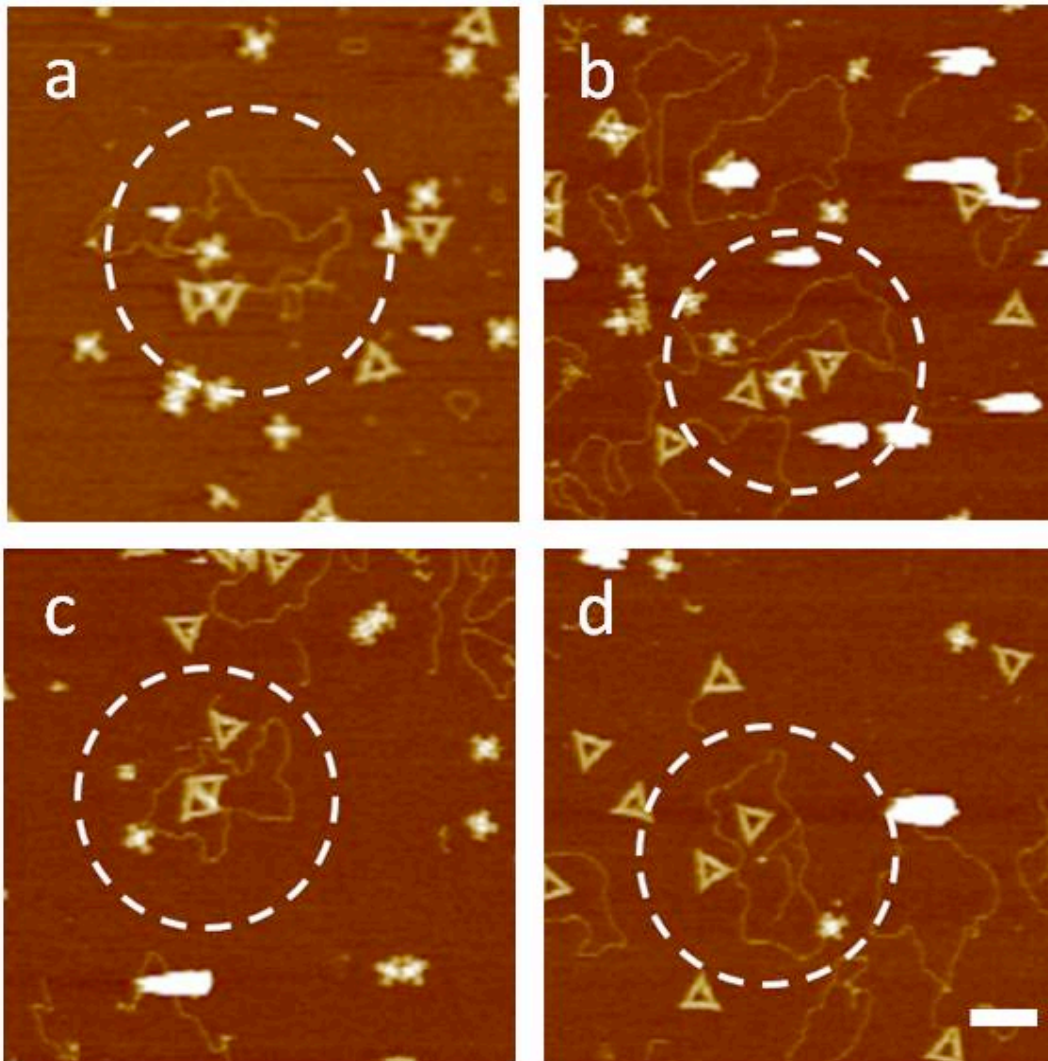

**Supplementary Figure 15** | (a-d) The site-specific triple labeling of phiX 174 by cross, triangular and STV-decorated (inner edge middle) triangular shaped ID with M3' strands at the corner point of origami. Scale bar: 200nm.

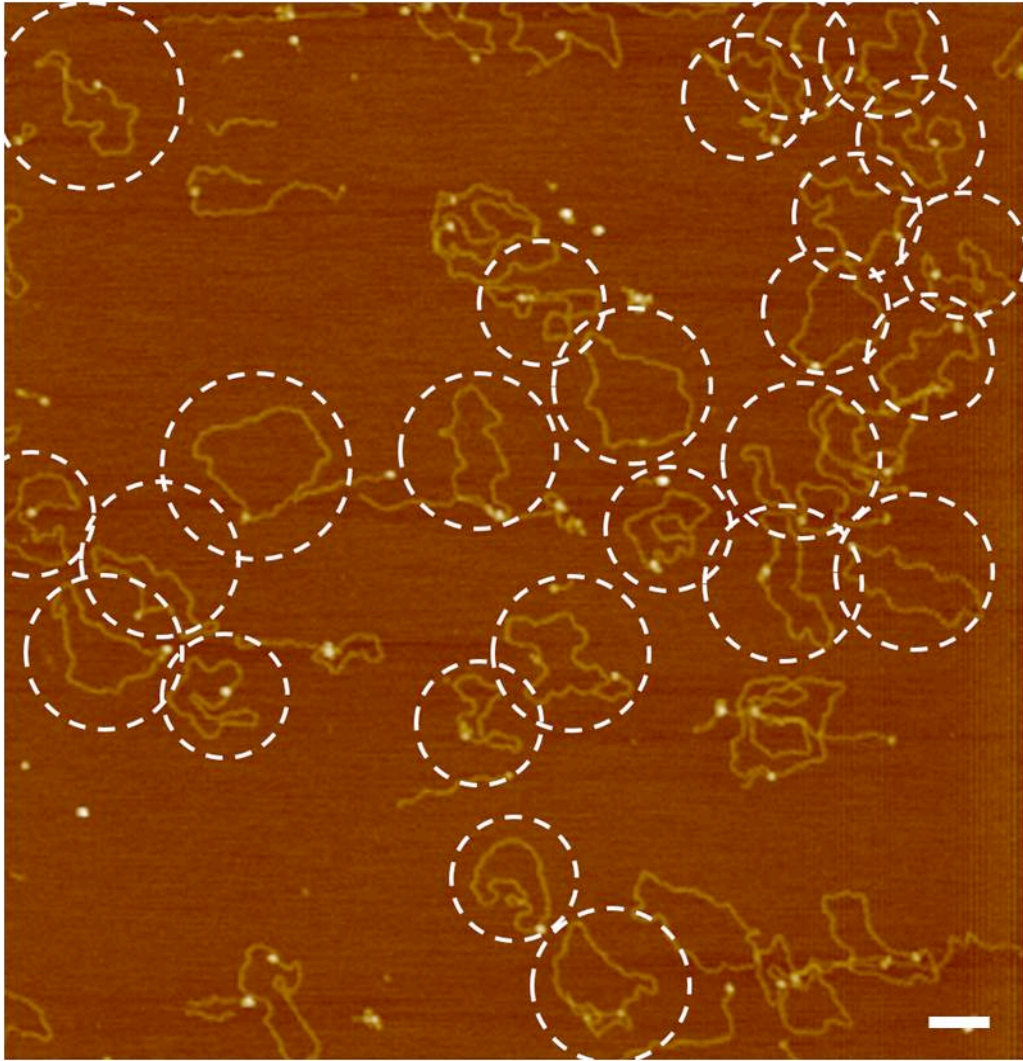

**Supplementary Figure 16** | The site-specific single-site labeling of phiX174 by STV.  
Scale bar: 200nm.



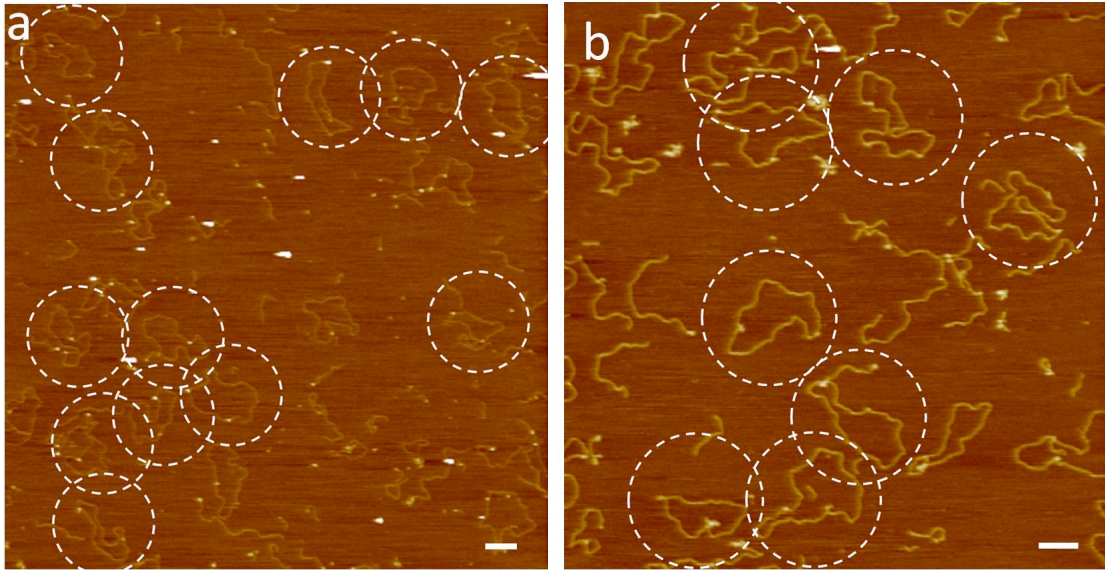

**Supplementary Figure 17** | (a, b) The site-specific two-site labeling of phiX174 by STV. Scale bar: 200nm.

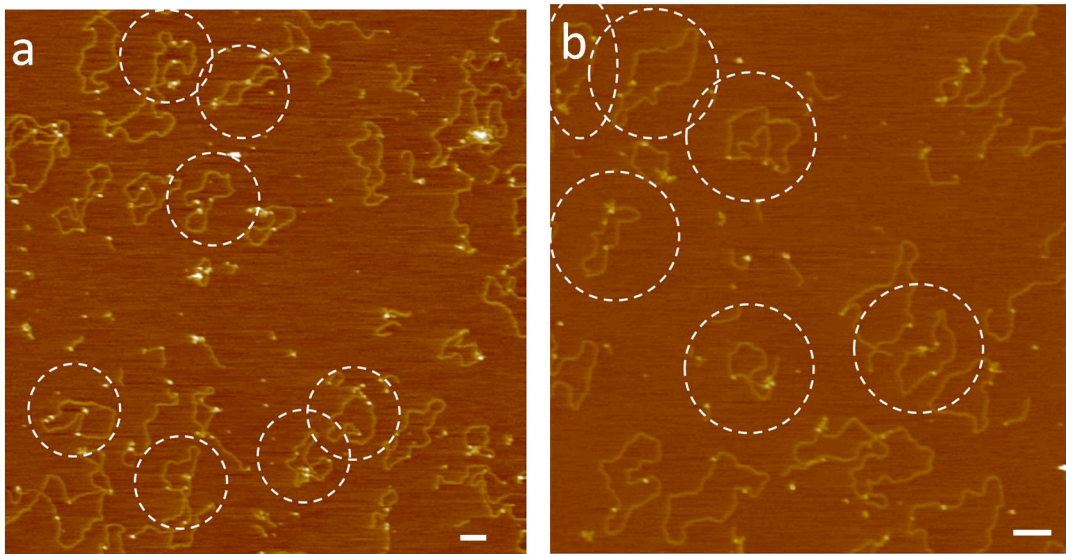

**Supplementary Figure 18** | (a,b) The site-specific three-site labeling of phiX174 by STV. Scale bar: 200nm.

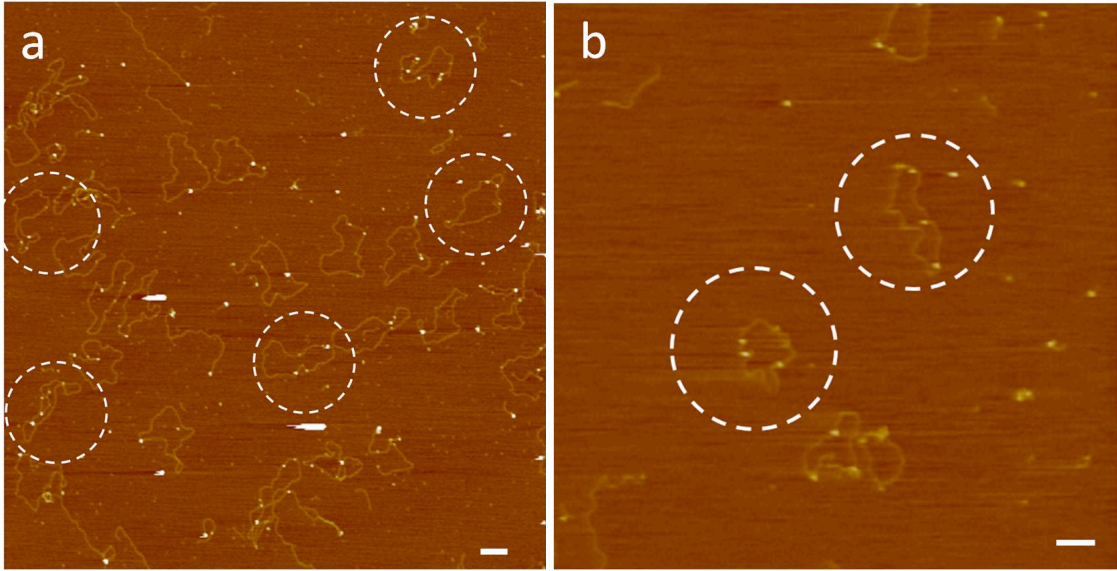

**Supplementary Figure 19** | (a, b) The site-specific four-site labeling of phiX174 by STV. Scale bar: 200nm.

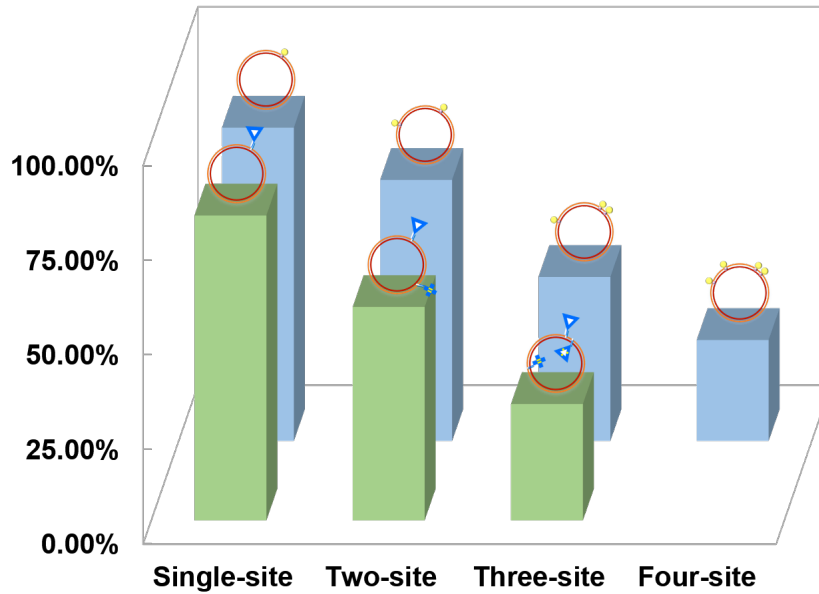

**Supplementary Figure 20** | The labeling efficiency of shape IDs (green columns) and STVs (blue columns) on phiX 174 template.

The labeling efficiency is based on the binding of M1 strand to DNA template, the primers extension under DNA polymerases and the labeling of the DNA origami IDs to M3 strand. Therefore, we utilized several 20-base 5' end biotin modified primers to investigate the extension efficiency of M1 strand on DNA. The schematic illustrations (Fig. S2A) and AFM images (Fig. S16-S19) showed the closed circularity DNA labeled with STVs at distinct sites. Because the binding efficiency of STV and biotin is almost 100%, we considered STV labeling efficiency as the extension efficiency of M1 strand on phiX174 template. The statistic analysis data showed that the extension efficiency was decreased from 82.8%, 69.0%, 43.3% to 26.7% as the number of modified primers increased from one to four. Considering the extension efficiency of M1 strand, single, dual and triple labeling efficiency of shape IDs are 80.6%, 56.4% and 30.8%, respectively.



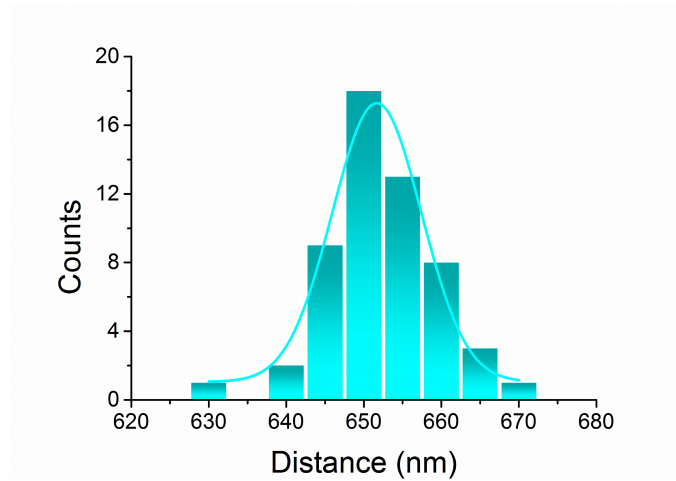

**Supplementary Figure 21** | Histograms for the counts of STVs as a function of distance between site 1433 and 4914 in phiX. The measured distance is 652 nm, which is in good agreement with the calculated distance 648 nm.

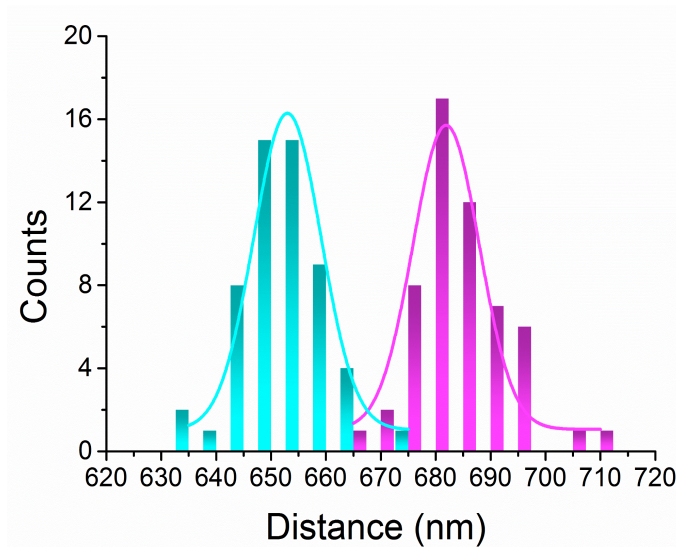

**Supplementary Figure 22** | Histograms for the counts of STVs as a function of distance between site 1433, 1529 and 4914 in phiX. The measured distances are 653 nm and 682 nm, which are in good agreement with the calculated distances 648 nm and 680 nm.

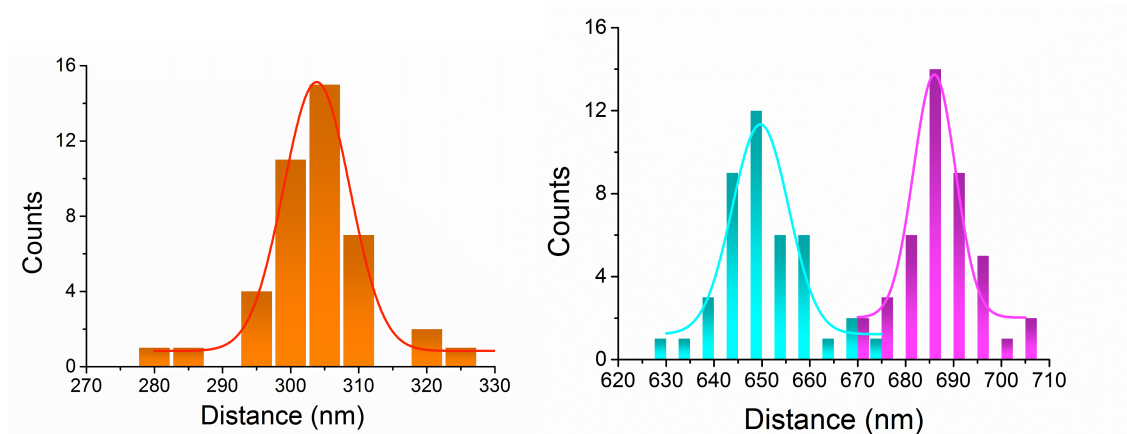

**Supplementary Figure 23** | Histograms for the counts of STVs as a function of distance between site 435 (upper), 1433, 1529 (lower) and 4914 in phiX. The measured distances are 304 nm, 650 nm and 686 nm, which are in good agreement with the calculated distances 308 nm, 648 nm and 680 nm.

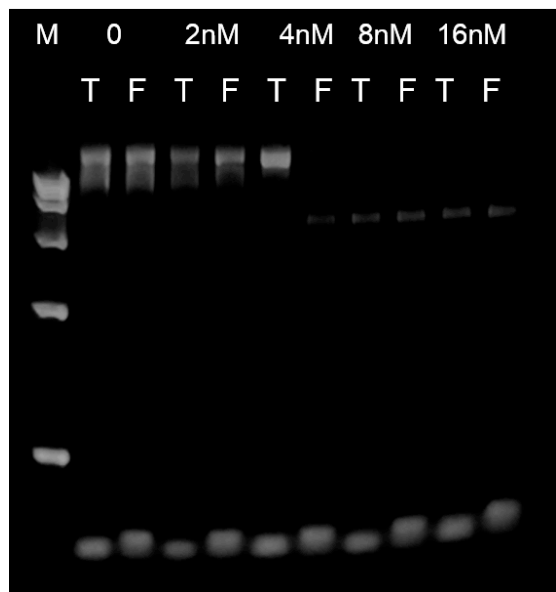

**Supplementary Figure 24** | Gel electrophoresis of the phiX174 DNA template's extension by perfectly matched primer (line T) and one-base mismatched primer (line F) assisted under different concentrations of AuNP. Line M, DL15,000 maker.

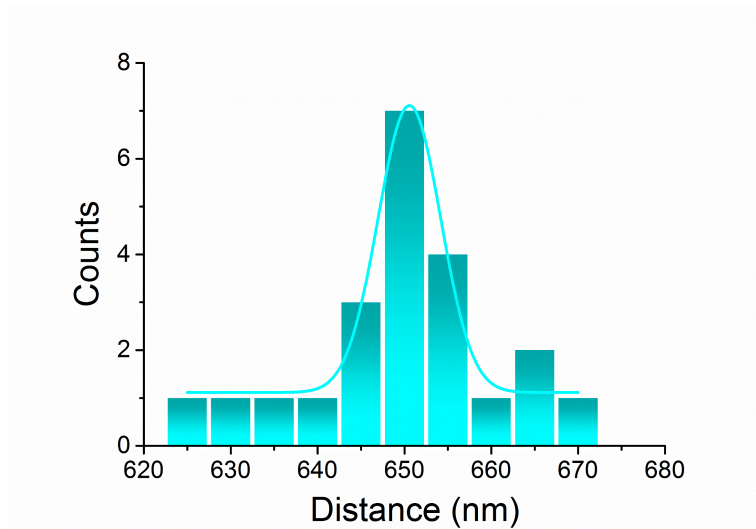

**Supplementary Figure 25** | Histogram of specificity of shape IDs labeling based on AuNPs-enhanced primer extension. The distance between site 1433 and 4914 is 651 nm, which is in good agreement with the calculated distance 648 nm.

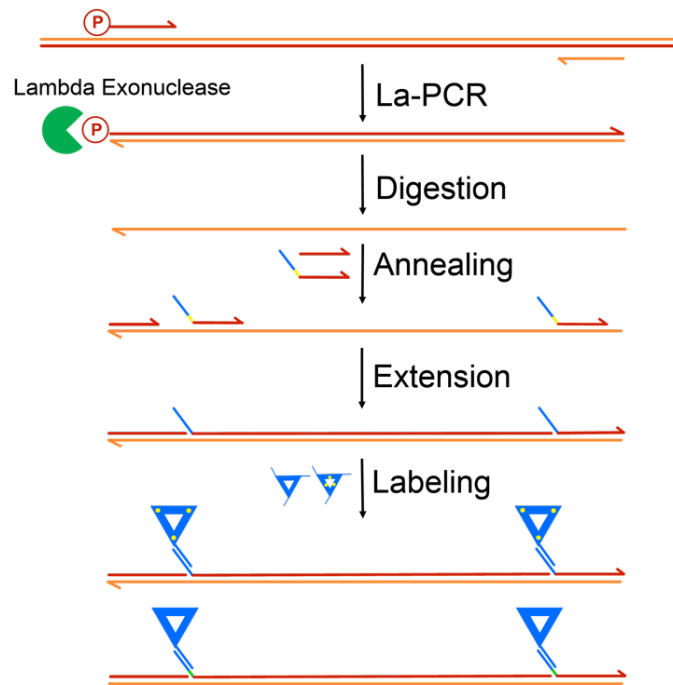

**Supplementary Figure 26** | The process for labeling genomic DNA extracted from human blood samples, which is subjected to long-range PCR amplification, digestion by lambda exonuclease to produce single strand DNA, allele-specific extension and labeling with shape IDs.



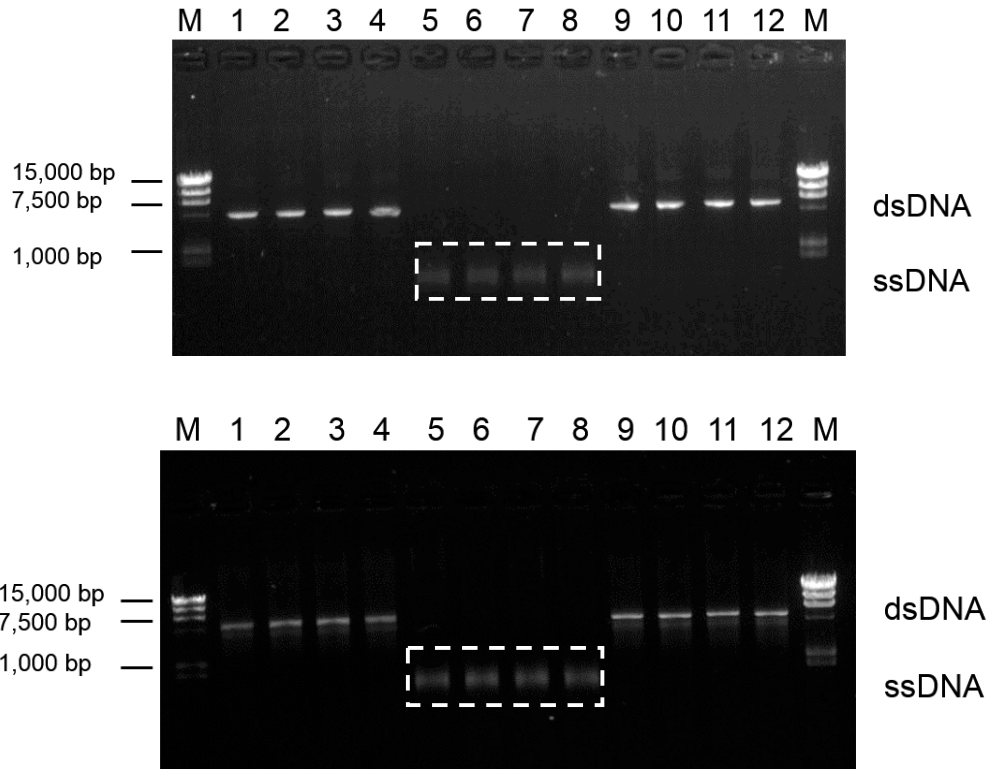

**Supplementary Figure 27** | Gel electrophoresis of regenerated dsDNA from ssDNA. 4.6-kb long-range PCR products of four different AMD samples (lanes 1–4) were digested with lambda exonuclease to produce the corresponding ssDNA (lanes 5–8, respectively). After primer extension, dsDNA samples were regenerated (lanes 9–12, respectively). Line M, DL15,000 maker.

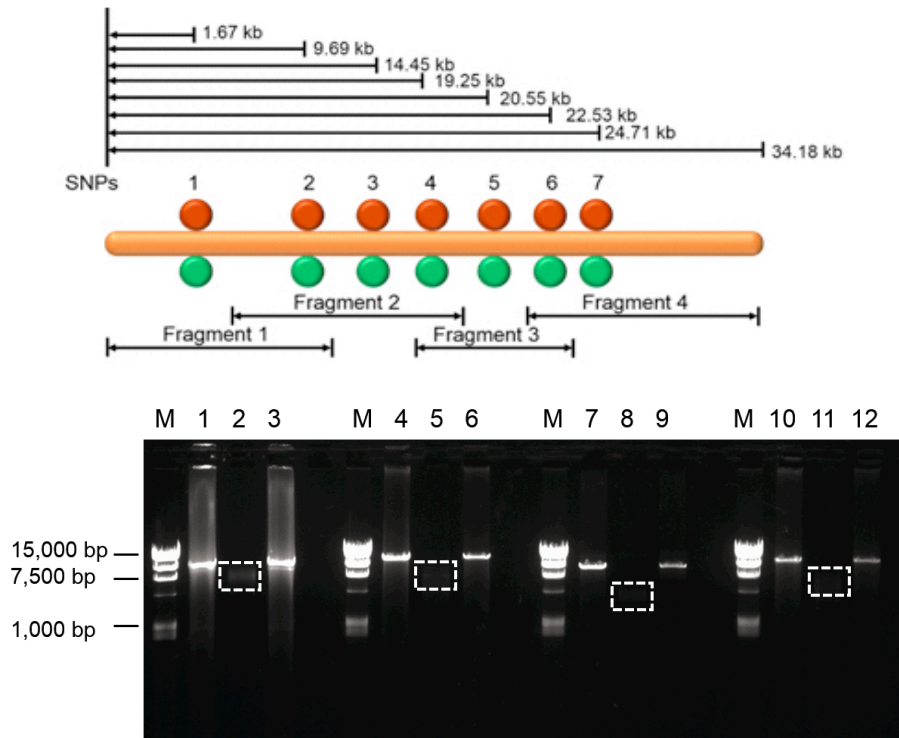

**Supplementary Figure 28** | Upper: schematic showing of a 34-kb region AMD sample, which is on the chromosome 10 from the Han Chinese population. It consists of seven SNP alleles that are split into four overlapping fragments. Each fragment contains two or three SNP loci, which has at least one SNP at the ends as “joint locus”. The “joint locus” is heterozygously shared by its adjacent fragment and used for subsequent fragment connection. Lower: Gel electrophoresis of regenerated dsDNA from ssDNA. Four fragments in 34-kb were generated by long-range PCR of one AMD samples (lanes 1, 4, 7 and 10) were digested with lambda exonuclease to produce the corresponding ssDNA (lanes 2, 5, 8 and 11, respectively). After primer extension, dsDNA samples were regenerated (lanes 3, 6, 9 and 12, respectively). Line M, DL15,000 maker.

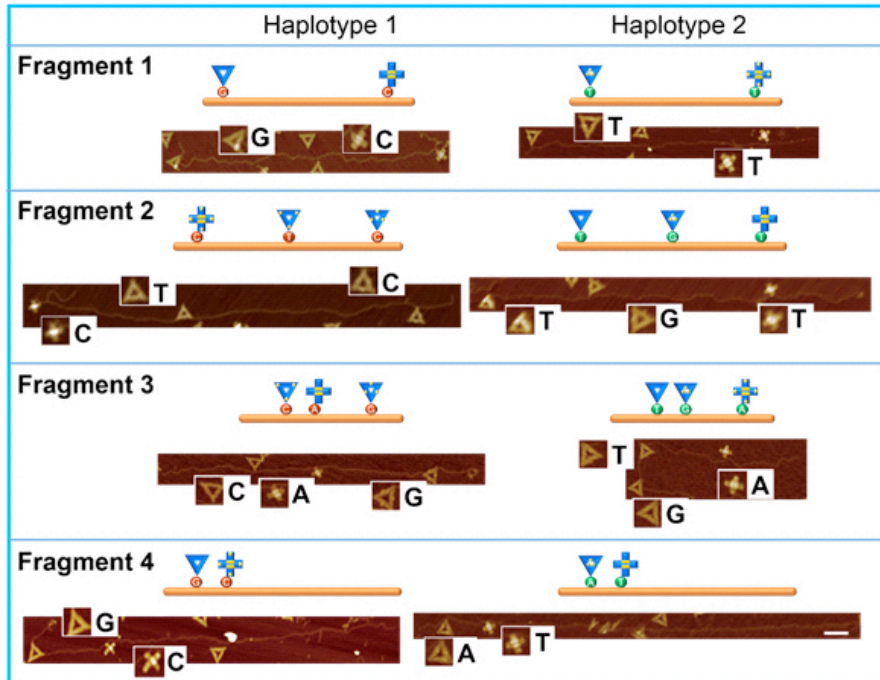

**Supplementary Figure 29 | AFM images for haplotypes of four fragments.** The haplotypes of each fragment can be directly read. For example, in the fragment 2, the two haplotypes of C-T-C and T-G-T correspond to SNPs 2, 3 and 4, respectively. Connection of the four fragments reconstructs continuous haplotypes for this 34-kb region. That is, haplotype 1 contains G-C-T-C-A-G-C, and haplotype 2 contains T-T-G-T-G-A-T.



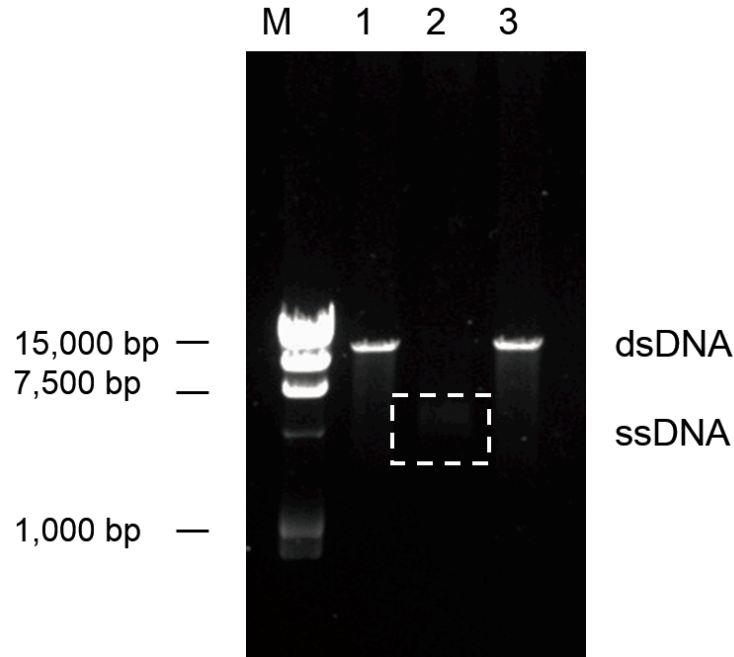

**Supplementary Figure 30 | Gel electrophoresis of regenerated dsDNA from ssDNA.** 12-kb long-range PCR product of one DNA samples (lanes 1) was digested with lambda exonuclease to produce the corresponding ssDNA (lanes 2). After primer extension, dsDNA samples were regenerated (lanes 3). Line M, DL15,000 maker.

For the three 4.6-kb region samples on the chromosome 3 (fig 4 in the old edition, new fig 5a), each sample from the patients was labeled six times independently, their yields were ~85%. For the 34-kb region AMD sample (fig 5a in the old edition, new fig 5b), it was labeled four times independently, the yields were 75%. For the sample of 12-kb region of p53 gene, it was labeled six times independently, the yields were 82%.

**Supplementary Table 1** | The labeling efficiency of shape IDs with different number of M3' strands in one origami (considering the extension efficiency of M1 strand). The black line inside the dashed circle indicates M3' strand.

|                                   |                                                                                   |                                                                                   |                                                                                    |                                                                                     |
|-----------------------------------|-----------------------------------------------------------------------------------|-----------------------------------------------------------------------------------|------------------------------------------------------------------------------------|-------------------------------------------------------------------------------------|
| <b>Shape IDs with M3' strands</b> | 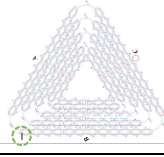 |  |  |  |
| <b>Labeling efficiency</b>        | <b>66.7%</b>                                                                      | <b>80.6%</b>                                                                      | <b>77.7%</b>                                                                       | <b>85.0%</b>                                                                        |

**Supplementary Table 2** | Sequences of staple strands for STV-decorated triangular and cross shaped DNA origami IDs. Sequence TTTTT is used as a spacer region.

| Staple strands |            | Sequences                                  |
|----------------|------------|--------------------------------------------|
| triA1bio       | 3'-Biontin | CGGGGTTTCCTCAAGAGAAGGATTTTGAATTA<br>TTTTT  |
| triB1bio       | 3'-Biontin | TCATATGTGTAATCGTAAAAC TAGTCATTTTC<br>TTTTT |
| triC1bio       | 3'-Biontin | TCGGGAGATATACAGTAACAGTACAAATAATT<br>TTTTT  |
|                |            |                                            |
| triLA2Cbio     | 3'-Biontin | TTAATTTTCATCTTAGACTTTACAA TTTTT            |
| triLB2Abio     | 3'-Biontin | TTTAATTGTATTTCCACCAGAGCC TTTTT             |
| triLC2Bbio     | 3'-Biontin | CGGTGCGGGCCTTCCAAAAACATT TTTTT             |
|                |            |                                            |
| triA4bio       | 3'-Biontin | ATGGTTTATGTCACAATCAATAGATATTAAC<br>TTTTT   |
| triB4bio       | 3'-Biontin | TTCGAGCTAAGACTTCAAATATCGGGAACGAG<br>TTTTT  |
| triC4bio       | 3'-Biontin | CGACCAGTACATTGGCAGATTCACCTGATTGC<br>TTTTT  |
| croM4bio       | 5'-Biontin | TTTTT<br>AATAGCAATAGATGGGCGCATCGTACCGTATC  |
| croM87bio      | 5'-Biontin | TTTTT<br>AATTCATCAACCATATCAAATTATAGATTTT   |
| croM93bio      | 3'-Biontin | ATAGTCAGGGAAGCCCGAAAGACTCAATTCTG<br>TTTTT  |
| croM175bio     | 3'-Biontin | CCAGAATGAAGCGTCATACATGGCAGCCCGGA<br>TTTTT  |

**Supplementary Table 3** | Sequences of M-strands and M3' staple strands in triangular, cross and rectangular shaped IDs for site-specific single- and multi-labeling of phiX174.

| M-strands and M3' staple strands | Allele | Location | Sequences                                                                                 |
|----------------------------------|--------|----------|-------------------------------------------------------------------------------------------|
| SNP1433tri B03                   |        |          | GTC GCT CTC TCA AGC AGA AT TTTT GGCAT<br>CAAAT TTGGG GCGCG AGCTA GTTAA AG                 |
| SNP1433tri B37                   |        |          | GTC GCT CTC TCA AGC AGA AT TTTT ACAGG<br>TAGAA AGATT CATCA GTTGA GATTT AG                 |
| SNP1433tri B65                   |        |          | GTC GCT CTC TCA AGC AGA AT TTTT CCTGA<br>CGAGA AACAC CAGAA CGAGT AGGCT GCTCA<br>TTCAG TGA |
| SNP1433cro M16                   |        |          | GTC GCT CTC TCA AGC AGA AT TTTT TAAGA<br>AAAGA TTGAC CGTAA TGGGC CAGCT TT                 |
| SNP1433cro AL3                   |        |          | GTC GCT CTC TCA AGC AGA AT TTTT AATAA<br>TAAGA GCAAG AGAAT TGAGT TAAGC CC                 |
| SNP1433cro AL6                   |        |          | GTC GCT CTC TCA AGC AGA AT TTTT AGCTG<br>ATTGC CCTTC ACAGT GAGAC GGGCA AC                 |
| SNP1433rec 121                   |        |          | GTC GCT CTC TCA AGC AGA AT TTTT GGTC<br>ATAAC CTGTT TATAT CGCG                            |
| SNP1433rec 211                   |        |          | GTC GCT CTC TCA AGC AGA AT TTTT CTGTA<br>GCTCA ACATG TATTG CTGA                           |
| SNP1433rec 205                   |        |          | GTC GCT CTC TCA AGC AGA AT TTTT CGATG<br>GCCCA CTACG TAAAC CGTC                           |
| SNP1433                          |        | #1433    | AT TCT GCT TGA GAG AGC GAC TTTT TACGG<br>TCAGG CATCC ACGGC                                |
| SNP1433tri A65                   |        |          | GTC GCT CTC TCA AGC AGA AT TTTT TGCTA<br>TTTTG CACCC AGCTA CAATT TTGTT TTGAA<br>GCCTT AAA |
| SNP1433tri B65                   |        |          | GTC GCT CTC TCA AGC AGA AT TTTT CCTGA<br>CGAGA AACAC CAGAA CGAGT AGGCT GCTCA<br>TTCAG TGA |
| SNP1433tri C65                   |        |          | GTC GCT CTC TCA AGC AGA AT TTTT ACGTG<br>GACTC CAACG TCAAA GGGCG AATTT GGAAC<br>AAGAG TCC |
| SNP1433                          |        | #1433    | AT TCT GCT TGA GAG AGC GAC TTTT TACGG<br>TCAGG CATCC ACGGC                                |
| SNP1529tri A65                   |        |          | GAA TGT CCG CGT CAG TCG TC TTTT TGCTA<br>TTTTG CACCC AGCTA CAATT TTGTT TTGAA<br>GCCTT AAA |
| SNP1529tri B65                   |        |          | GAA TGT CCG CGT CAG TCG TC TTTT CCTGA<br>CGAGA AACAC CAGAA CGAGT AGGCT GCTCA              |



|                   |   |       |                                                                                           |
|-------------------|---|-------|-------------------------------------------------------------------------------------------|
|                   |   |       | TTCAG TGA                                                                                 |
| SNP1529tri<br>C65 |   |       | GAA TGT CCG CGT CAG TCG TC TTTT ACGTG<br>GACTC CAACG TCAAA GGGCG AATTT GGAAC<br>AAGAG TCC |
| SNP1529           |   | #1529 | GA CGA CTG ACG CGG ACA TTC TTTT TCAGG<br>AGGAA GCGGA GCAGT                                |
| SNP4914cro<br>AU6 |   |       | GTG CTG ACA CGG CCT GAT CC TTTT GAGGA<br>CTAAA GACTT TCGGC TACAG AGGCT TT                 |
| SNP4914cro<br>AD1 |   |       | GTG CTG ACA CGG CCT GAT CC TTTT CGTTA<br>ATATT TTGTT AATAT TTAAT TTGTA AA                 |
| SNP4914cro<br>AL6 |   |       | GTG CTG ACA CGG CCT GAT CC TTTT AGCTG<br>ATTGC CCTTC ACAGT GAGAC GGGCA AC                 |
| SNP4914cro<br>AR1 |   |       | GTG CTG ACA CGG CCT GAT CC TTTT GTTAA<br>ATAAG AATAA AGTGT GATAA ATAAG GC                 |
| SNP4914           | G | #4914 | GG ATC AGG CCG TGT CAG CAC TTTT TGTAG<br>CGAAC TGCGA TGGGC                                |
| SNP4914C          | C | #4914 | AT TCT GCT TGA GAG AGC GAC TTTT TGTAG<br>CGAAC TGCGA TGGGG                                |
| SNP1463cro<br>AU6 |   |       | GTG CTG ACA CGG CCT GAT CC TTTT GAGGA<br>CTAAA GACTT TCGGC TACAG AGGCT TT                 |
| SNP1463cro<br>AD1 |   |       | GTG CTG ACA CGG CCT GAT CC TTTT CGTTA<br>ATATT TTGTT AATAT TTAAT TTGTA AA                 |
| SNP1463cro<br>AL6 |   |       | GTG CTG ACA CGG CCT GAT CC TTTT AGCTG<br>ATTGC CCTTC ACAGT GAGAC GGGCA AC                 |
| SNP1463cro<br>AR1 |   |       | GTG CTG ACA CGG CCT GAT CC TTTT GTTAA<br>ATAAG AATAA AGTGT GATAA ATAAG GC                 |
| SNP1463           |   | #1463 | GG ATC AGG CCG TGT CAG CAC TTTT CTTGA<br>TTAAG CTCAT TAGGG                                |

**Supplementary Table 4** | Sequences of strands for site-specific STV-labeling of phiX174.

| Strands    |            | Location | Sequences                     |
|------------|------------|----------|-------------------------------|
| SNP435bio  | 5'-Biontin | #435     | TTTTT GCCAA AGCGG TCTGG AAACG |
| SNP1433bio | 5'-Biontin | #1433    | TTTTT TACGGTCAGGCATCCACGGC    |
| SNP1529bio | 5'-Biontin | #1529    | TTTTT TCAGG AGGAA GCGGA GCAGT |
| SNP4914bio | 5'-Biontin | #4914    | TTTTT TGTAGCGAACTGCGATGGGC    |

**Supplementary Table 5** | Sequences of PCR primers, M-strands and M3' staple strands in shape IDs for site-specific labeling of polymorphic sites on 4.6-kb region AMD samples (chr3:39273966-39278556).

| Strands          |                      | Allele | Location | Sequences                                                                                 |
|------------------|----------------------|--------|----------|-------------------------------------------------------------------------------------------|
| Pri4L            | 5'<br>Phosphorylated |        | 0        | TCTGCAGGCAGATAATGAGG                                                                      |
| Pri4R            |                      |        | 4.6kb    | GAAGGGAGGGGAGAAGAAGA                                                                      |
| SNP1-C           | rs17038640           | C      | 1.2kb    | AT TCT GCT TGA GAG AGC GAC TTTT<br>ACAGT TGATT GGACT TTCA G                               |
| SNP1-T           | rs17038640           | T      | 1.2kb    | GG ATC AGG CCG TGT CAG CAC TTTT<br>ACAGT TGATT GGACT TTCA A                               |
| SNP1triA<br>65-C |                      |        |          | GTC GCT CTC TCA AGC AGA AT TTTT<br>TGCTA TTTTG CACCC AGCTA CAATT<br>TTGTT TTGAA GCCTT AAA |
| SNP1triB<br>65-C |                      |        |          | GTC GCT CTC TCA AGC AGA AT TTTT<br>CCTGA CGAGA AACAC CAGAA CGAGT<br>AGGCT GCTCA TTCAG TGA |
| SNP1triC<br>65-C |                      |        |          | GTC GCT CTC TCA AGC AGA AT TTTT<br>ACGTG GACTC CAACG TCAAA GGGCG<br>AATTT GGAAC AAGAG TCC |
| SNP1triA<br>65-T |                      |        |          | GTG CTG ACA CGG CCT GAT CC TTTT<br>TGCTA TTTTG CACCC AGCTA CAATT<br>TTGTT TTGAA GCCTT AAA |
| SNP1triB<br>65-T |                      |        |          | GTG CTG ACA CGG CCT GAT CC TTTT<br>CCTGA CGAGA AACAC CAGAA CGAGT<br>AGGCT GCTCA TTCAG TGA |
| SNP1triC<br>65-T |                      |        |          | GTG CTG ACA CGG CCT GAT CC TTTT<br>ACGTG GACTC CAACG TCAAA GGGCG<br>AATTT GGAAC AAGAG TCC |
| SNP2-C           | rs4676487            | C      | 4.2kb    | AT TCT GCT TGA GAG AGC GAC TTTT<br>CCTTC CCAGG GACCT TGCC G                               |
| SNP2-T           | rs4676487            | T      | 4.2kb    | GG ATC AGG CCG TGT CAG CAC TTTT<br>CCTTC CCAGG GACCT TGCC A                               |
| SNP2triA<br>65-C |                      |        |          | GTG CTG ACA CGG CCT GAT CC TTTT<br>TGCTA TTTTG CACCC AGCTA CAATT<br>TTGTT TTGAA GCCTT AAA |
| SNP2triB<br>65-C |                      |        |          | GTG CTG ACA CGG CCT GAT CC TTTT<br>CCTGA CGAGA AACAC CAGAA CGAGT<br>AGGCT GCTCA TTCAG TGA |
| SNP2triC<br>65-C |                      |        |          | GTG CTG ACA CGG CCT GAT CC TTTT<br>ACGTG GACTC CAACG TCAAA GGGCG<br>AATTT GGAAC AAGAG TCC |

|                  |  |  |  |                                                                                           |
|------------------|--|--|--|-------------------------------------------------------------------------------------------|
| SNP2triA<br>65-T |  |  |  | GTC GCT CTC TCA AGC AGA AT TTTT<br>TGCTA TTTG CACCC AGCTA CAATT<br>TTGTT TTGAA GCCTT AAA  |
| SNP2triB<br>65-T |  |  |  | GTC GCT CTC TCA AGC AGA AT TTTT<br>CCTGA CGAGA AACAC CAGAA CGAGT<br>AGGCT GCTCA TTCAG TGA |
| SNP2triC<br>65-T |  |  |  | GTC GCT CTC TCA AGC AGA AT TTTT<br>ACGTG GACTC CAACG TCAAA GGGCG<br>AATTT GGAAC AAGAG TCC |

**Supplementary Table 6** | Sequences of PCR primers, M-strands and M3' staple strands in shape IDs for site-specific labeling of polymorphic sites on 34-kb region AMD samples (chr10:124200000-124235605).

| Strands             |                          | Allele | Location | Sequences                                                                                 |
|---------------------|--------------------------|--------|----------|-------------------------------------------------------------------------------------------|
| Pri-1L              | 5'<br>Phospho<br>rylated |        | 0.5kb    | CCCTAAGGCAGTGGTTCT                                                                        |
| Pri-1R              |                          |        | 11.3kb   | TGTTGGCTGGACTCGGTA                                                                        |
| Pri-2L              | 5'<br>Phospho<br>rylated |        | 8.6kb    | TTGGTGGTTAGTGGTTT                                                                         |
| Pri-2R              |                          |        | 20.3kb   | CCAAGTGCGTGATTATTT                                                                        |
| Pri-3L              | 5'<br>Phospho<br>rylated |        | 16.9kb   | GTTAGTGGCTACCCTCTTG                                                                       |
| Pri-3R              |                          |        | 25.3kb   | GCCTTCCTACAGTCCCTC                                                                        |
| Pri-4L              | 5'<br>Phospho<br>rylated |        | 22.0kb   | AGAAGTCATTTTCGGTTGC                                                                       |
| Pri-4R              |                          |        | 34.2kb   | CTCTTGATAAGCGTCTGG                                                                        |
| SNP1666-<br>G       | rs22926<br>27            | G      | 1.7kb    | GA CTG CCT CTC ACC CAC CAT TTTT<br>TTACC TTCCA TGACT CACT G                               |
| SNP1666-<br>T       | rs22926<br>27            | T      | 1.7kb    | AC GTT ACC GGA CCT TAG CGA TTTT<br>TTACC TTCCA TGACT CACT T                               |
| SNP1666t<br>riA65-G |                          |        |          | ATG GTG GGT GAG AGG CAG TC TTTT<br>TGCTA TTTG CACCC AGCTA CAATT<br>TTGTT TTGAA GCCTT AAA  |
| SNP1666t<br>riB65-G |                          |        |          | ATG GTG GGT GAG AGG CAG TC TTTT<br>CCTGA CGAGA AACAC CAGAA CGAGT<br>AGGCT GCTCA TTCAG TGA |
| SNP1666t<br>riC65-G |                          |        |          | ATG GTG GGT GAG AGG CAG TC TTTT<br>ACGTG GACTC CAACG TCAAA GGGCG<br>AATTT GGAAC AAGAG TCC |
| SNP1666t<br>riA65-T |                          |        |          | TCG CTA AGG TCC GGT AAC GT TTTT<br>TGCTA TTTG CACCC AGCTA CAATT                           |

|                     |                |   |       |                                                                                           |
|---------------------|----------------|---|-------|-------------------------------------------------------------------------------------------|
|                     |                |   |       | TTGTT TTGAA GCCTT AAA                                                                     |
| SNP1666t<br>riB65-T |                |   |       | TCG CTA AGG TCC GGT AAC GT TTTT<br>CCTGA CGAGA AACAC CAGAA CGAGT<br>AGGCT GCTCA TTCAG TGA |
| SNP1666t<br>riC65-T |                |   |       | TCG CTA AGG TCC GGT AAC GT TTTT<br>ACGTG GACTC CAACG TCAAA GGGCG<br>AATTT GGAAC AAGAG TCC |
|                     |                |   |       |                                                                                           |
| SNP9685-<br>C       | rs11200<br>630 | C | 9.7kb | AT TCT GCT TGA GAG AGC GAC TTTT<br>GTCCA GGCAG TAGCT TGAA C                               |
| SNP9685-<br>T       | rs11200<br>630 | T | 9.7kb | GG ATC AGG CCG TGT CAG CAC TTTT<br>GTCCA GGCAG TAGCT TGAA T                               |
| SNP9685<br>croAU6-C |                |   |       | GTC GCT CTC TCA AGC AGA AT TTTT<br>GAGGA CTAAA GACTT TCGGC TACAG<br>AGGCT TT              |
| SNP9685<br>croAD1-C |                |   |       | GTC GCT CTC TCA AGC AGA AT TTTT<br>CGTTA ATATT TTGTT AATAT TTAAA<br>TTGTA AA              |
| SNP9685<br>croAL6-C |                |   |       | GTC GCT CTC TCA AGC AGA AT TTTT<br>AGCTG ATTGC CCTTC ACAGT GAGAC<br>GGGCA AC              |
| SNP9685<br>croAR1-C |                |   |       | GTC GCT CTC TCA AGC AGA AT TTTT<br>GTAA ATAAG AATAA AGTGT GATAA<br>ATAAG GC               |
| SNP9685<br>croAU6-T |                |   |       | GTG CTG ACA CGG CCT GAT CC TTTT<br>GAGGA CTAAA GACTT TCGGC TACAG<br>AGGCT TT              |
| SNP9685<br>croAD1-T |                |   |       | GTG CTG ACA CGG CCT GAT CC TTTT<br>CGTTA ATATT TTGTT AATAT TTAAA<br>TTGTA AA              |
| SNP9685<br>croAL6-T |                |   |       | GTG CTG ACA CGG CCT GAT CC TTTT<br>AGCTG ATTGC CCTTC ACAGT GAGAC<br>GGGCA AC              |
| SNP9685<br>croAR1-T |                |   |       | GTG CTG ACA CGG CCT GAT CC TTTT<br>GTAA ATAAG AATAA AGTGT GATAA<br>ATAAG GC               |
| SNP9685t<br>riA65-T |                |   |       | GTG CTG ACA CGG CCT GAT CC TTTT<br>TGCTA TTTG CACCC AGCTA CAATT<br>TTGTT TTGAA GCCTT AAA  |
| SNP9685t<br>riB65-T |                |   |       | GTG CTG ACA CGG CCT GAT CC TTTT<br>CCTGA CGAGA AACAC CAGAA CGAGT<br>AGGCT GCTCA TTCAG TGA |
| SNP9685t<br>riC65-T |                |   |       | GTG CTG ACA CGG CCT GAT CC TTTT<br>ACGTG GACTC CAACG TCAAA GGGCG<br>AATTT GGAAC AAGAG TCC |
|                     |                |   |       |                                                                                           |



|                      |                |   |        |                                                                                            |
|----------------------|----------------|---|--------|--------------------------------------------------------------------------------------------|
| SNP1444<br>9-G       | rs10490<br>924 | G | 14.4kb | GA CGA CTG ACG CGG ACA TTC TTTTT<br>ACACT CCATG ATCCC AGCT G                               |
| SNP1444<br>9-T       | rs10490<br>924 | T | 14.4kb | CT AAC CTT GTG TCG TAG ACA TTTTT<br>ACACT CCATG ATCCC AGCT T                               |
| SNP1444<br>9triA65-G |                |   |        | GAA TGT CCG CGT CAG TCG TC TTTTT<br>TGCTA TTTTG CACCC AGCTA CAATT<br>TTGTT TTGAA GCCTT AAA |
| SNP1444<br>9triB65-G |                |   |        | GAA TGT CCG CGT CAG TCG TC TTTTT<br>CCTGA CGAGA AACAC CAGAA CGAGT<br>AGGCT GCTCA TTCAG TGA |
| SNP1444<br>9triC65-G |                |   |        | GAA TGT CCG CGT CAG TCG TC TTTTT<br>ACGTG GACTC CAACG TCAAA GGGCG<br>AATTT GGAAC AAGAG TCC |
| SNP1444<br>9triA65-T |                |   |        | TGT CTA CGA CAC AAG GTT AG TTTTT<br>TGCTA TTTTG CACCC AGCTA CAATT<br>TTGTT TTGAA GCCTT AAA |
| SNP1444<br>9triB65-T |                |   |        | TGT CTA CGA CAC AAG GTT AG TTTTT<br>CCTGA CGAGA AACAC CAGAA CGAGT<br>AGGCT GCTCA TTCAG TGA |
| SNP1444<br>9triC65-T |                |   |        | TGT CTA CGA CAC AAG GTT AG TTTTT<br>ACGTG GACTC CAACG TCAAA GGGCG<br>AATTT GGAAC AAGAG TCC |
|                      |                |   |        |                                                                                            |
| SNP1925<br>3-G       | rs38291<br>98  | G | 19.3kb | GA CTG CCT CTC ACC CAC CAT TTTTT<br>GCAAA GCAGT GGGGA AGTT G                               |
| SNP1925<br>3-A       | rs38291<br>98  | A | 19.3kb | AC GTT ACC GGA CCT TAG CGA TTTTT<br>GCAAA GCAGT GGGGA AGTT A                               |
| SNP1925<br>3triA65-G |                |   |        | ATG GTG GGT GAG AGG CAG TC TTTTT<br>TGCTA TTTTG CACCC AGCTA CAATT<br>TTGTT TTGAA GCCTT AAA |
| SNP1925<br>3triB65-G |                |   |        | ATG GTG GGT GAG AGG CAG TC TTTTT<br>CCTGA CGAGA AACAC CAGAA CGAGT<br>AGGCT GCTCA TTCAG TGA |
| SNP1925<br>3triC65-G |                |   |        | ATG GTG GGT GAG AGG CAG TC TTTTT<br>ACGTG GACTC CAACG TCAAA GGGCG<br>AATTT GGAAC AAGAG TCC |
| SNP1925<br>3triA65-A |                |   |        | TCG CTA AGG TCC GGT AAC GT TTTTT<br>TGCTA TTTTG CACCC AGCTA CAATT<br>TTGTT TTGAA GCCTT AAA |
| SNP1925<br>3triB65-A |                |   |        | TCG CTA AGG TCC GGT AAC GT TTTTT<br>CCTGA CGAGA AACAC CAGAA CGAGT<br>AGGCT GCTCA TTCAG TGA |
| SNP1925<br>3triC65-A |                |   |        | TCG CTA AGG TCC GGT AAC GT TTTTT<br>ACGTG GACTC CAACG TCAAA GGGCG<br>AATTT GGAAC AAGAG TCC |
| SNP1925              |                |   |        | TCG CTA AGG TCC GGT AAC GT TTTTT                                                           |

|                      |                |   |        |                                                                                            |
|----------------------|----------------|---|--------|--------------------------------------------------------------------------------------------|
| 3croAU6-A            |                |   |        | GAGGA CTAAA GACTT TCGGC TACAG<br>AGGCT TT                                                  |
| SNP1925<br>3croAD1-A |                |   |        | TCG CTA AGG TCC GGT AAC GT TTTTT<br>CGTTA ATATT TTGTT AATAT TAAAA<br>TTGTA AA              |
| SNP1925<br>3croAL6-A |                |   |        | TCG CTA AGG TCC GGT AAC GT TTTTT<br>AGCTG ATTGC CCTTC ACAGT GAGAC<br>GGGCA AC              |
| SNP1925<br>3croAR1-A |                |   |        | TCG CTA AGG TCC GGT AAC GT TTTTT<br>GTAA ATAAG AATAA AGTGT GATAA<br>ATAAG GC               |
|                      |                |   |        |                                                                                            |
| SNP2054<br>5-A       | rs11200<br>638 | A | 20.5kb | AT TCT GCT TGA GAG AGC GAC TTTTT<br>GCGGA CGCTG CCTTC GTCC A                               |
| SNP2054<br>5-G       | rs11200<br>638 | G | 20.5kb | GG ATC AGG CCG TGT CAG CAC TTTTT<br>GCGGA CGCTG CCTTC GTCC G                               |
| SNP2054<br>5croAU6-A |                |   |        | GTC GCT CTC TCA AGC AGA AT TTTTT<br>GAGGA CTAAA GACTT TCGGC TACAG<br>AGGCT TT              |
| SNP2054<br>5croAD1-A |                |   |        | GTC GCT CTC TCA AGC AGA AT TTTTT<br>CGTTA ATATT TTGTT AATAT TAAAA<br>TTGTA AA              |
| SNP2054<br>5croAL6-A |                |   |        | GTC GCT CTC TCA AGC AGA AT TTTTT<br>AGCTG ATTGC CCTTC ACAGT GAGAC<br>GGGCA AC              |
| SNP2054<br>5croAR1-A |                |   |        | GTC GCT CTC TCA AGC AGA AT TTTTT<br>GTAA ATAAG AATAA AGTGT GATAA<br>ATAAG GC               |
| SNP2054<br>5triA65-G |                |   |        | GTG CTG ACA CGG CCT GAT CC TTTTT<br>TGCTA TTTTG CACCC AGCTA CAATT<br>TTGTT TTGAA GCCTT AAA |
| SNP2054<br>5triB65-G |                |   |        | GTG CTG ACA CGG CCT GAT CC TTTT<br>CCTGA CGAGA AACAC CAGAA CGAGT<br>AGGCT GCTCA TTCAG TGA  |
| SNP2054<br>5triC65-G |                |   |        | GTG CTG ACA CGG CCT GAT CC TTTTT<br>ACGTG GACTC CAACG TCAAA GGGCG<br>AATTT GGAAC AAGAG TCC |
|                      |                |   |        |                                                                                            |
| SNP2253<br>4-G       | rs76222<br>657 | G | 22.5kb | CT AAC CTT GTG TCG TAG ACA TTTTT<br>GGCAG AGGCC ATGTG GAAA G                               |
| SNP2253<br>4-A       | rs76222<br>657 | A | 22.5kb | GA CGA CTG ACG CGG ACA TTC TTTTT<br>GGCAG AGGCC ATGTG GAAA A                               |
| SNP2253<br>4triA65-G |                |   |        | TGT CTA CGA CAC AAG GTT AG TTTTT<br>TGCTA TTTTG CACCC AGCTA CAATT<br>TTGTT TTGAA GCCTT AAA |
| SNP2253              |                |   |        | TGT CTA CGA CAC AAG GTT AG TTTTT                                                           |

|                          |                |   |        |                                                                                           |
|--------------------------|----------------|---|--------|-------------------------------------------------------------------------------------------|
| 4triB65-G                |                |   |        | CCTGA CGAGA AACAC CAGAA CGAGT<br>AGGCT GCTCA TTCAG TGA                                    |
| SNP2253<br>4triC65-G     |                |   |        | TGT CTA CGA CAC AAG GTT AG TTTT<br>ACGTG GACTC CAACG TCAAA GGGCG<br>AATTT GGAAC AAGAG TCC |
| SNP2253<br>4croAU6-<br>A |                |   |        | GAA TGT CCG CGT CAG TCG TC TTTT<br>GAGGA CTA AA GACTT TCGGC TACAG<br>AGGCT TT             |
| SNP2253<br>4croAD1-<br>A |                |   |        | GAA TGT CCG CGT CAG TCG TC TTTT<br>CGTTA ATATT TTGTT AATAT TAA A<br>TTGTA AA              |
| SNP2253<br>4croAL6-<br>A |                |   |        | GAA TGT CCG CGT CAG TCG TC TTTT<br>AGCTG ATTGC CCTTC ACAGT GAGAC<br>GGGCA AC              |
| SNP2253<br>4croAR1-<br>A |                |   |        | GAA TGT CCG CGT CAG TCG TC TTTT<br>GTAA ATAAG AATAA AGTGT GATAA<br>ATAAG GC               |
| SNP2253<br>4triA65-A     |                |   |        | GAA TGT CCG CGT CAG TCG TC TTTT<br>TGCTA TTTTG CACCC AGCTA CAATT<br>TTGTT TTGAA GCCTT AAA |
| SNP2253<br>4triB65-A     |                |   |        | GAA TGT CCG CGT CAG TCG TC TTTT<br>CCTGA CGAGA AACAC CAGAA CGAGT<br>AGGCT GCTCA TTCAG TGA |
| SNP2253<br>4triC65-A     |                |   |        | GAA TGT CCG CGT CAG TCG TC TTTT<br>ACGTG GACTC CAACG TCAAA GGGCG<br>AATTT GGAAC AAGAG TCC |
|                          |                |   |        |                                                                                           |
| SNP2470<br>8-C           | rs12218<br>299 | C | 24.7kb | AT TCT GCT TGA GAG AGC GAC TTTT<br>TGGAA ATGAA GGCAA ATCA C                               |
| SNP2470<br>8-T           | rs12218<br>299 | T | 24.7kb | GG ATC AGG CCG TGT CAG CAC TTTT<br>TGGAA ATGAA GGCAA ATCA T                               |
| SNP2470<br>8croAU6-<br>C |                |   |        | GTC GCT CTC TCA AGC AGA AT TTTT<br>GAGGA CTA AA GACTT TCGGC TACAG<br>AGGCT TT             |
| SNP2470<br>8croAD1-<br>C |                |   |        | GTC GCT CTC TCA AGC AGA AT TTTT<br>CGTTA ATATT TTGTT AATAT TAA A<br>TTGTA AA              |
| SNP2470<br>8croAL6-<br>C |                |   |        | GTC GCT CTC TCA AGC AGA AT TTTT<br>AGCTG ATTGC CCTTC ACAGT GAGAC<br>GGGCA AC              |
| SNP2470<br>8croAR1-<br>C |                |   |        | GTC GCT CTC TCA AGC AGA AT TTTT<br>GTAA ATAAG AATAA AGTGT GATAA<br>ATAAG GC               |
| SNP2470<br>8croAU6-<br>T |                |   |        | GTG CTG ACA CGG CCT GAT CC TTTT<br>GAGGA CTA AA GACTT TCGGC TACAG<br>AGGCT TT             |

|                          |  |  |  |                                                                              |
|--------------------------|--|--|--|------------------------------------------------------------------------------|
| SNP2470<br>8croAD1-<br>T |  |  |  | GTG CTG ACA CGG CCT GAT CC TTTT<br>CGTTA ATATT TTGTT AATAT TAAA<br>TTGTA AA  |
| SNP2470<br>8croAL6-<br>T |  |  |  | GTG CTG ACA CGG CCT GAT CC TTTT<br>AGCTG ATTGC CCTTC ACAGT GAGAC<br>GGGCA AC |
| SNP2470<br>8croAR1-<br>T |  |  |  | GTG CTG ACA CGG CCT GAT CC TTTT<br>GTAA ATAAG AATAA AGTGT GATAA<br>ATAAG GC  |

**Supplementary Table 7** | Sequences of PCR primers, sequencing primers, M-strands and M3' staple strands in shape IDs for site-specific labeling of polymorphic sites on p53 gene samples (chr17: 7577233-7589583).

| Strands              |                          | Allele | Location | Sequences                                                                     |
|----------------------|--------------------------|--------|----------|-------------------------------------------------------------------------------|
| Pri12L               | 5'<br>Phosphor<br>ylated |        |          | CCATCTACTCCCAACCAC                                                            |
| Pri12R               |                          |        |          | AATGATGGGTCGTTTGATA                                                           |
| SPri1L               |                          |        |          | CCATCTACTCCCAACCAC                                                            |
| SPri1R               |                          |        |          | TACCACCATCCACTACAATA                                                          |
| SPri2L               |                          |        |          | GCAGCAAAGAAACAAACA                                                            |
| SPri2R               |                          |        |          | TCACCCATCTACAGTCCC                                                            |
| SPri3L               |                          |        |          | GTCGGGCTTCTGTCCTTC                                                            |
| Spri3R               |                          |        |          | GTGGCACAACCATAATAACTC                                                         |
| SNP77407-A           | rs129510<br>53           | A      | 0.2kb    | AT TCT GCT TGA GAG AGC GAC<br>TTTTT TGGAT GGGTA GTAGT ATGG<br>A               |
| SNP77407-C           | rs129510<br>54           | C      | 0.2kb    | GG ATC AGG CCG TGT CAG CAC<br>TTTTT TGGAT GGGTA GTAGT ATGG<br>C               |
| SNP77407cro<br>AU6-A |                          |        |          | GTC GCT CTC TCA AGC AGA AT<br>TTTTT GAGGA CTAAA GACTT<br>TCGGC TACAG AGGCT TT |
| SNP77407cro<br>AD1-A |                          |        |          | GTC GCT CTC TCA AGC AGA AT<br>TTTTT CGTTA ATATT TTGTT AATAT<br>TAAA TTGTA AA  |
| SNP77407cro<br>AL6-A |                          |        |          | GTC GCT CTC TCA AGC AGA AT<br>TTTTT AGCTG ATTGC CCTTC ACAGT<br>GAGAC GGGCA AC |
| SNP77407cro<br>AR1-A |                          |        |          | GTC GCT CTC TCA AGC AGA AT<br>TTTTT GTAA ATAAG AATAA<br>AGTGT GATAA ATAAG GC  |
| SNP77407cro<br>AU6-C |                          |        |          | GTG CTG ACA CGG CCT GAT CC<br>TTTTT GAGGA CTAAA GACTT                         |



|                      |                |   |        |                                                                                               |
|----------------------|----------------|---|--------|-----------------------------------------------------------------------------------------------|
|                      |                |   |        | TCGGC TACAG AGGCT TT                                                                          |
| SNP77407cro<br>AD1-C |                |   |        | GTG CTG ACA CGG CCT GAT CC<br>TTTTT CGTTA ATATT TTGTT AATAT<br>TAAA TTGTA AA                  |
| SNP77407cro<br>AL6-C |                |   |        | GTG CTG ACA CGG CCT GAT CC<br>TTTTT AGCTG ATTGC CCTTC ACAGT<br>GAGAC GGGCA AC                 |
| SNP77407cro<br>AR1-C |                |   |        | GTG CTG ACA CGG CCT GAT CC<br>TTTTT GTTAA ATAAG AATAA<br>AGTGT GATAA ATAAG GC                 |
|                      |                |   |        |                                                                                               |
| SNP79472-C           | rs104252<br>2  | C | 2.2kb  | GA CGA CTG ACG CGG ACA TTC<br>TTTTT TGCTG GTGCA GGGGC CACG<br>G                               |
| SNP79472-G           | rs104252<br>3  | G | 2.2kb  | CT AAC CTT GTG TCG TAG ACA<br>TTTTT TGCTG GTGCA GGGGC CACG<br>C                               |
| SNP79472tri<br>A65-C |                |   |        | GAA TGT CCG CGT CAG TCG TC<br>TTTTT TGCTA TTTTG CACCC AGCTA<br>CAATT TTGTT TTGAA GCCTT AAA    |
| SNP79472triB<br>65-C |                |   |        | GAA TGT CCG CGT CAG TCG TC<br>TTTTT CCTGA CGAGA AACAC<br>CAGAA CGAGT AGGCT GCTCA<br>TTCAG TGA |
| SNP79472triC<br>65-C |                |   |        | GAA TGT CCG CGT CAG TCG TC<br>TTTTT ACGTG GACTC CAACG<br>TCAA GGGCG AATT GGAAC<br>AAGAG TCC   |
| SNP79472tri<br>A65-G |                |   |        | TGT CTA CGA CAC AAG GTT AG<br>TTTTT TGCTA TTTTG CACCC AGCTA<br>CAATT TTGTT TTGAA GCCTT AAA    |
| SNP79472triB<br>65-G |                |   |        | TGT CTA CGA CAC AAG GTT AG<br>TTTTT CCTGA CGAGA AACAC<br>CAGAA CGAGT AGGCT GCTCA<br>TTCAG TGA |
| SNP79472triC<br>65-G |                |   |        | TGT CTA CGA CAC AAG GTT AG<br>TTTTT ACGTG GACTC CAACG<br>TCAA GGGCG AATT GGAAC<br>AAGAG TCC   |
|                      |                |   |        |                                                                                               |
| SNP88560-G           | rs178822<br>27 |   | 11.3kb | GA CTG CCT CTC ACC CAC CAT<br>TTTTT ACGAA AACAT ATGAT CACA<br>G                               |
| SNP88560-A           | rs178822<br>28 |   | 11.3kb | AC GTT ACC GGA CCT TAG CGA<br>TTTTT ACGAA AACAT ATGAT CACA<br>A                               |

|                      |  |  |  |                                                                                               |
|----------------------|--|--|--|-----------------------------------------------------------------------------------------------|
| SNP88560tri<br>A65-G |  |  |  | ATG GTG GGT GAG AGG CAG TC<br>TTTTT TGCTA TTTTG CACCC AGCTA<br>CAATT TTGTT TTGAA GCCTT AAA    |
| SNP88560triB<br>65-G |  |  |  | ATG GTG GGT GAG AGG CAG TC<br>TTTTT CCTGA CGAGA AACAC<br>CAGAA CGAGT AGGCT GCTCA<br>TTCAG TGA |
| SNP88560triC<br>65-G |  |  |  | ATG GTG GGT GAG AGG CAG TC<br>TTTTT ACGTG GACTC CAACG<br>TCAAA GGGCG AATTT GGAAC<br>AAGAG TCC |
| SNP88560tri<br>A65-A |  |  |  | TCG CTA AGG TCC GGT AAC GT<br>TTTTT TGCTA TTTTG CACCC AGCTA<br>CAATT TTGTT TTGAA GCCTT AAA    |
| SNP88560triB<br>65-A |  |  |  | TCG CTA AGG TCC GGT AAC GT<br>TTTTT CCTGA CGAGA AACAC<br>CAGAA CGAGT AGGCT GCTCA<br>TTCAG TGA |
| SNP88560triC<br>65-A |  |  |  | TCG CTA AGG TCC GGT AAC GT<br>TTTTT ACGTG GACTC CAACG<br>TCAAA GGGCG AATTT GGAAC<br>AAGAG TCC |
